# Supplementary material for: Mechanical Stress Signaling in Pancreatic Cancer Cells Triggers p38 MAPK- and JNK-Dependent Cytoskeleton Remodeling and Promotes Cell Migration via Rac1/cdc42/Myosin II
Source: Oxford University Press journal article supplement (doi:10.1158/1541-7786.mcr-21-0266), 2021-11-15
Supplement: mcr-21-0266_supp1.docx [file mcr-21-0266_supp1.docx]

**SUPPLEMENTARY FIGURES AND TABLES**

**
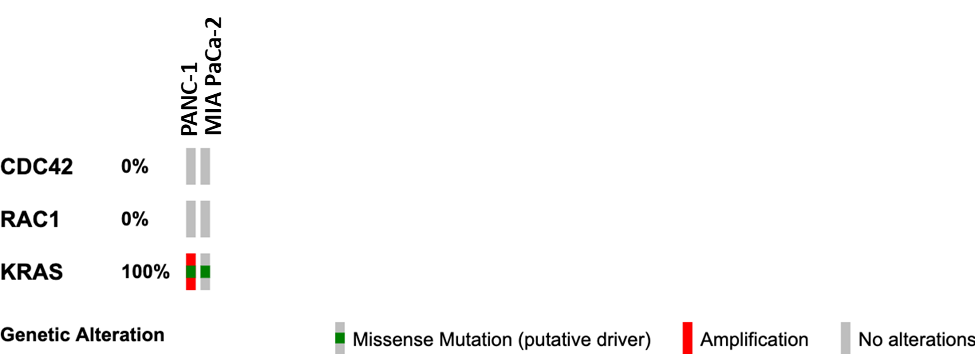
**

**Supplementary Figure 1. Mutational profile for key genes in the cell lines studied.** Oncoprint was generated using cBioportal.


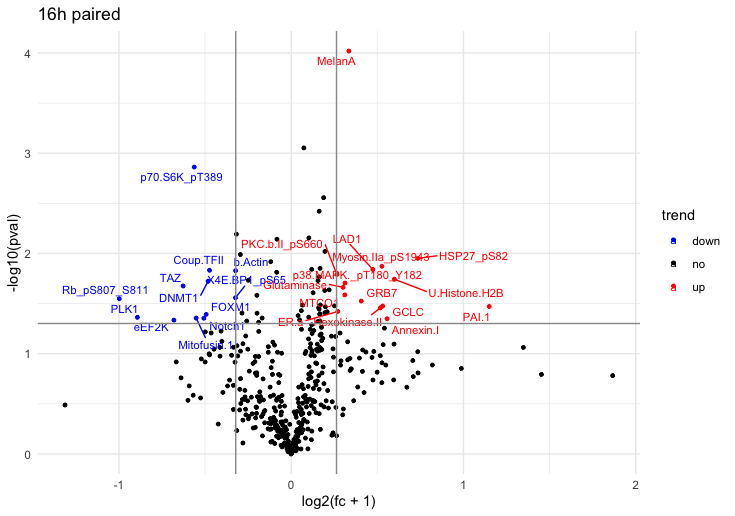


**Supplementary Figure 2.** **Volcano plot of proteins altered by mechanical stress.** Values represent the log2-ratio (compressed/uncompressed) of expression level for each protein in each condition (n=3; 3 biological replicates). All proteins are depicted in this plot, with black color for no significant change, red for increase (>20%) and blue for decrease (<20%).


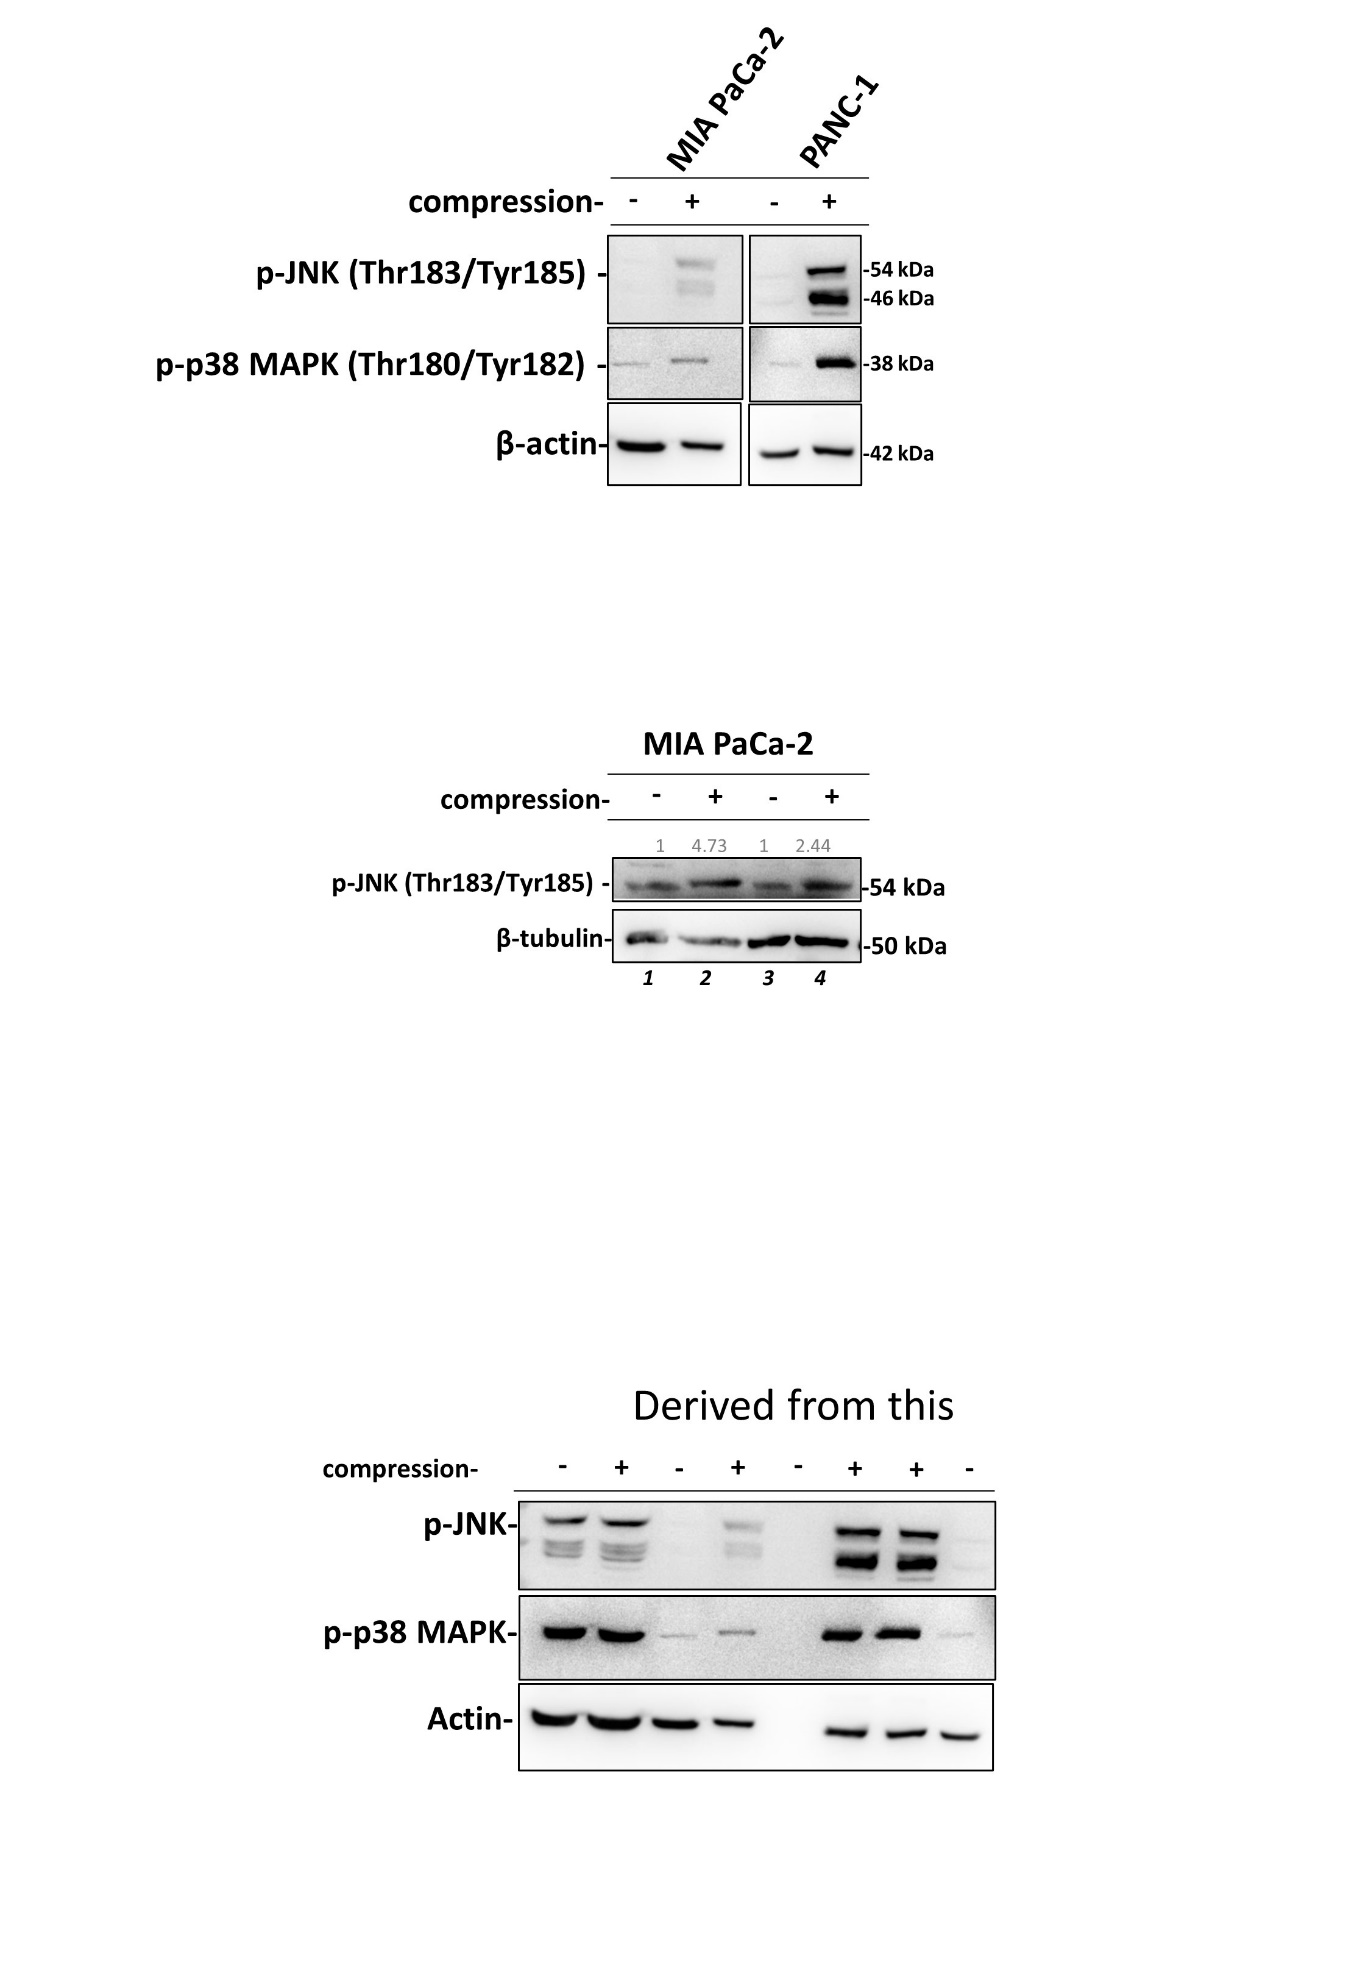


**Supplement Figure 3. Immunoblotting showing activated JNK (Thr183/Tyr185) in control and compressed MIA PaCa-2 cells.** Quantification of pJNK compared to β-tubulin, with fold changes indicated in grey font.


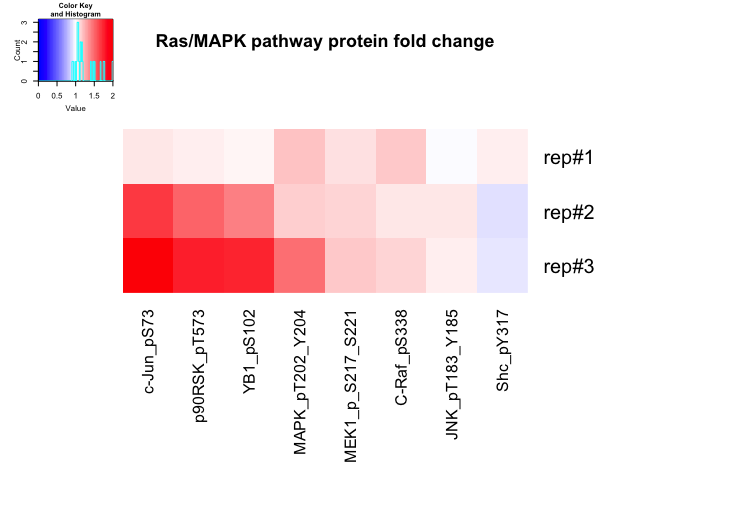

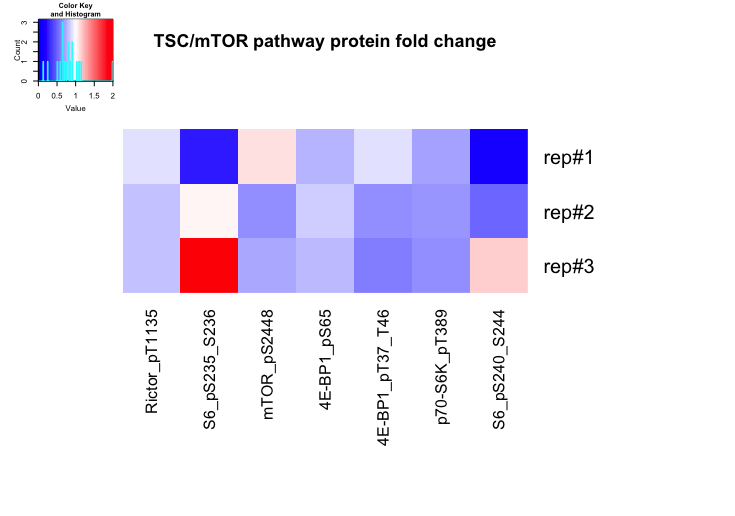


**Supplement Figure 4. Mechanical stress upregulates the RAS/MAPK and downregulates the TSC/mTOR pathway.** Heatmaps showing the expression level of each protein member in the selected pathways. Values in the heatmap represent the log2-ratio (compressed/uncompressed) of expression level for each protein in each condition (n=3; 3 biological replicates). Red: increase vs. blue: decrease.


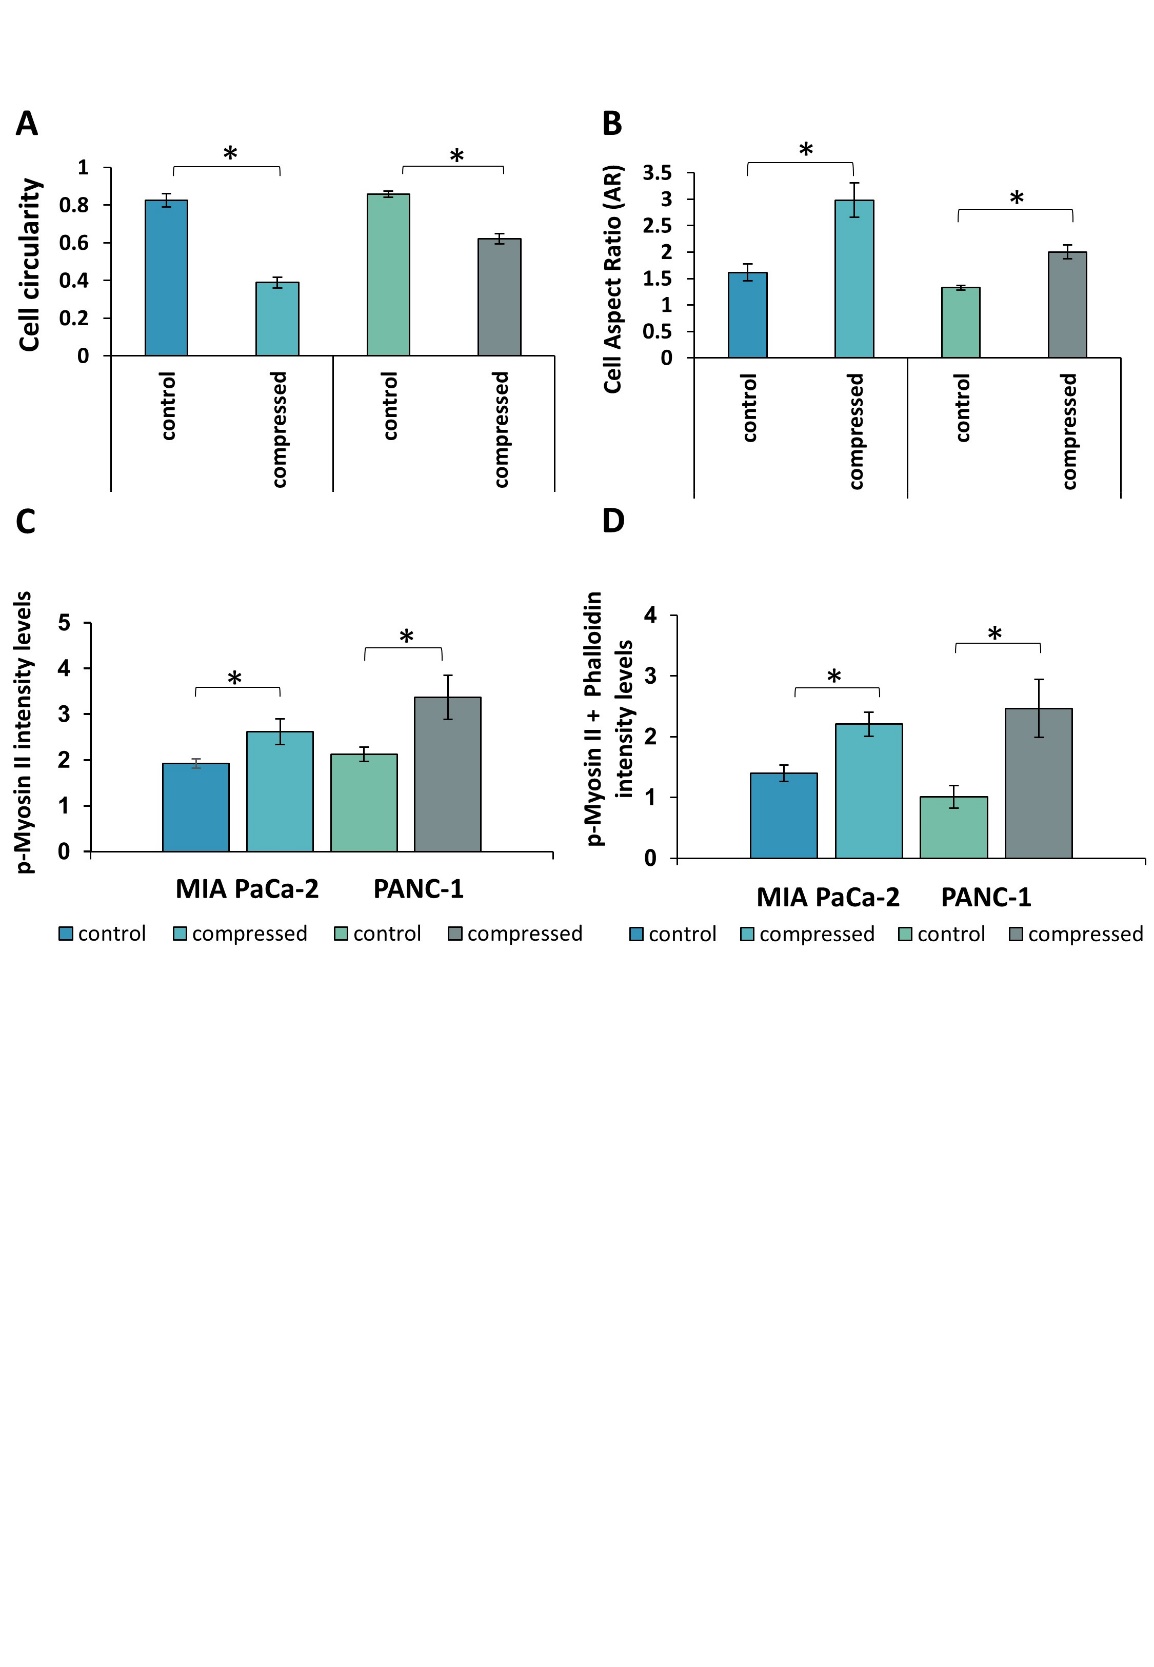


**Supplementary Figure 5**. **A-B**, The average cell circularity (**A**) and aspect ratio **(B)** (major/minor axis of the cell) was quantified using ImageJ. For cell circularity, a value of 1.0 indicates a perfect circle. Asterisk (*) indicates a statistically significant difference (p<0.05 in student’s t test, n≥25). **C-D**, The average of p-Myosin II **(C)** and p-Myosin II + phalloidin (D) area fraction normalized to DAPI fraction in control and compressed cells was quantified automatically using an in-house code in MATLAB. Asterisk (*) indicates a statistically significant difference (p<0.05 in student’s t test).


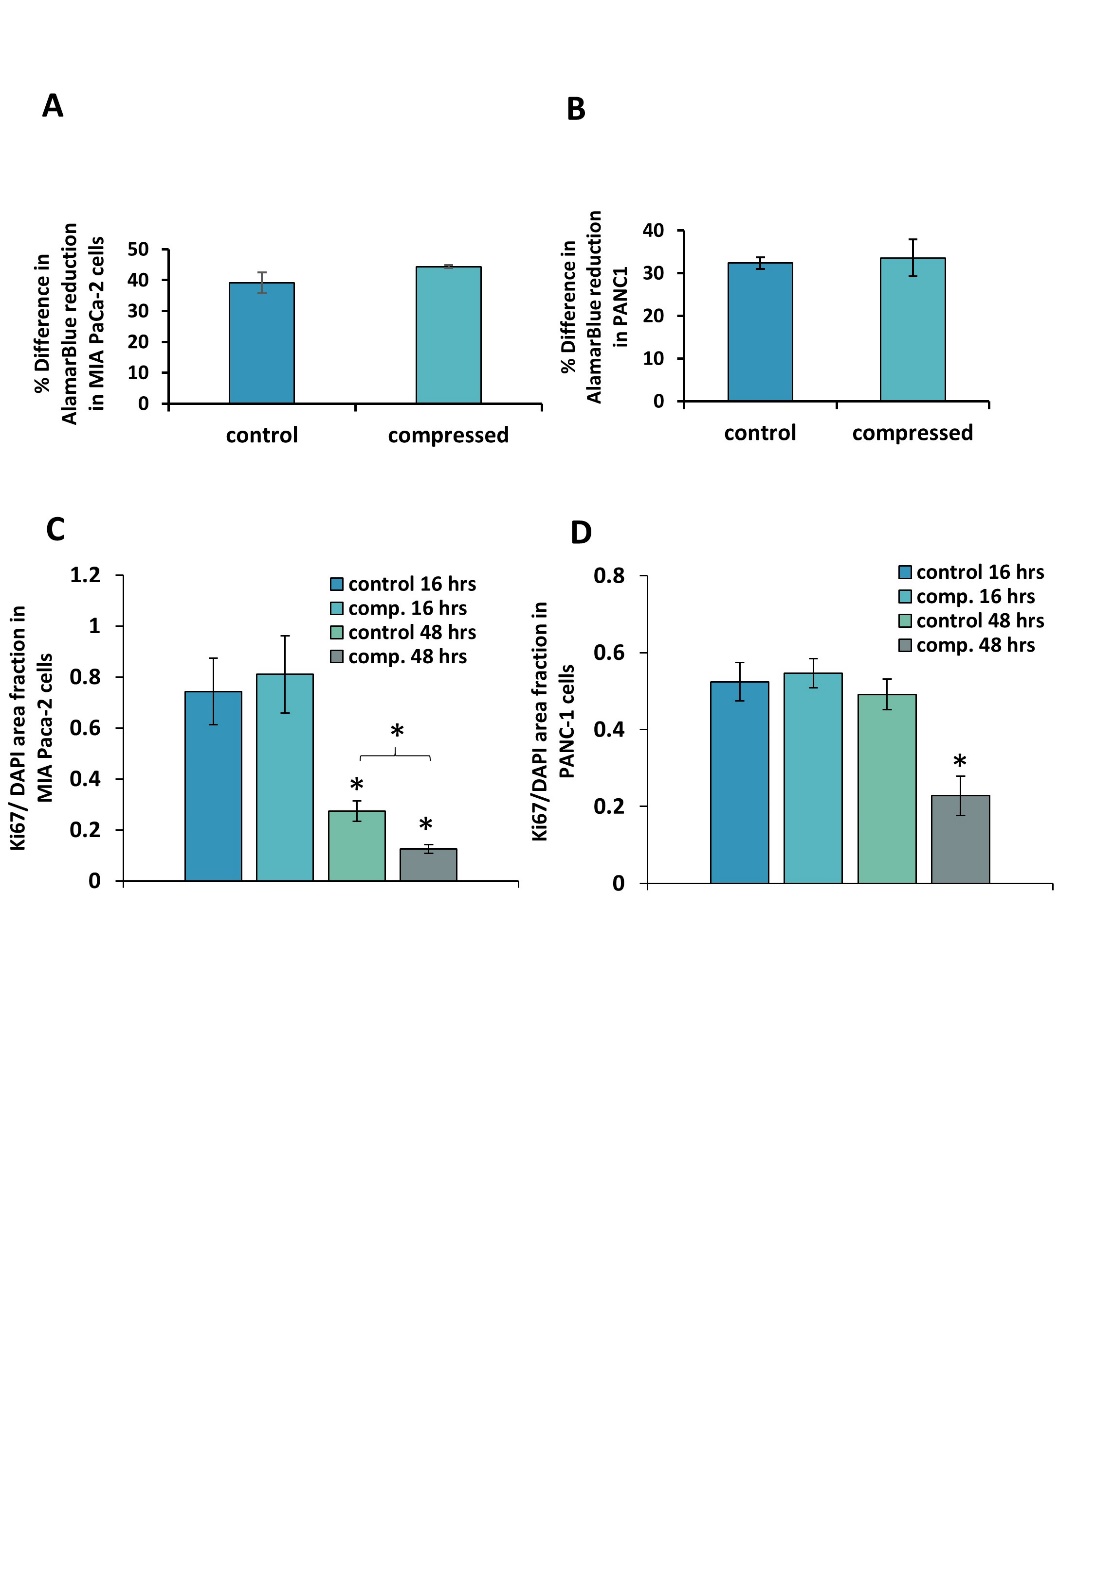


**Supplementary Figure 6. The effect of mechanical stress on the viability and proliferation of pancreatic cancer cells. A-B,** MIA PaCa-2 and PANC-1 cells were subjected to 0.0 (agarose cushion only) or 4.0 mmHg compressive stress for 16 hours, and AlamarBlue assay was performed pre- and post-compression. The absorbance measured by AlamarBlue reagent represents the metabolic activity of the cells, and thus it was used as an indicator for cell viability. Graphs represent the average % difference ±SE in AlamarBlue reduction pre-and post-compression in control and compressed cells. No statistically significant differences were observed in compressed cells as compared to the control (2 biological replicates; n=6, *p<0.05 in student’s t test). **C-D**, MIA PaCa-2 and PANC-1 cells were compressed for 16 and 48 hours and then were stained with Ki67, a marker for proliferation. The average Ki67 area fraction from at least 8 different fields/condition from two biological replicates was quantified automatically using an in-house code in MATLAB. Asterisk (*) indicates a statistically significant difference (p<0.05 in student’s t test).


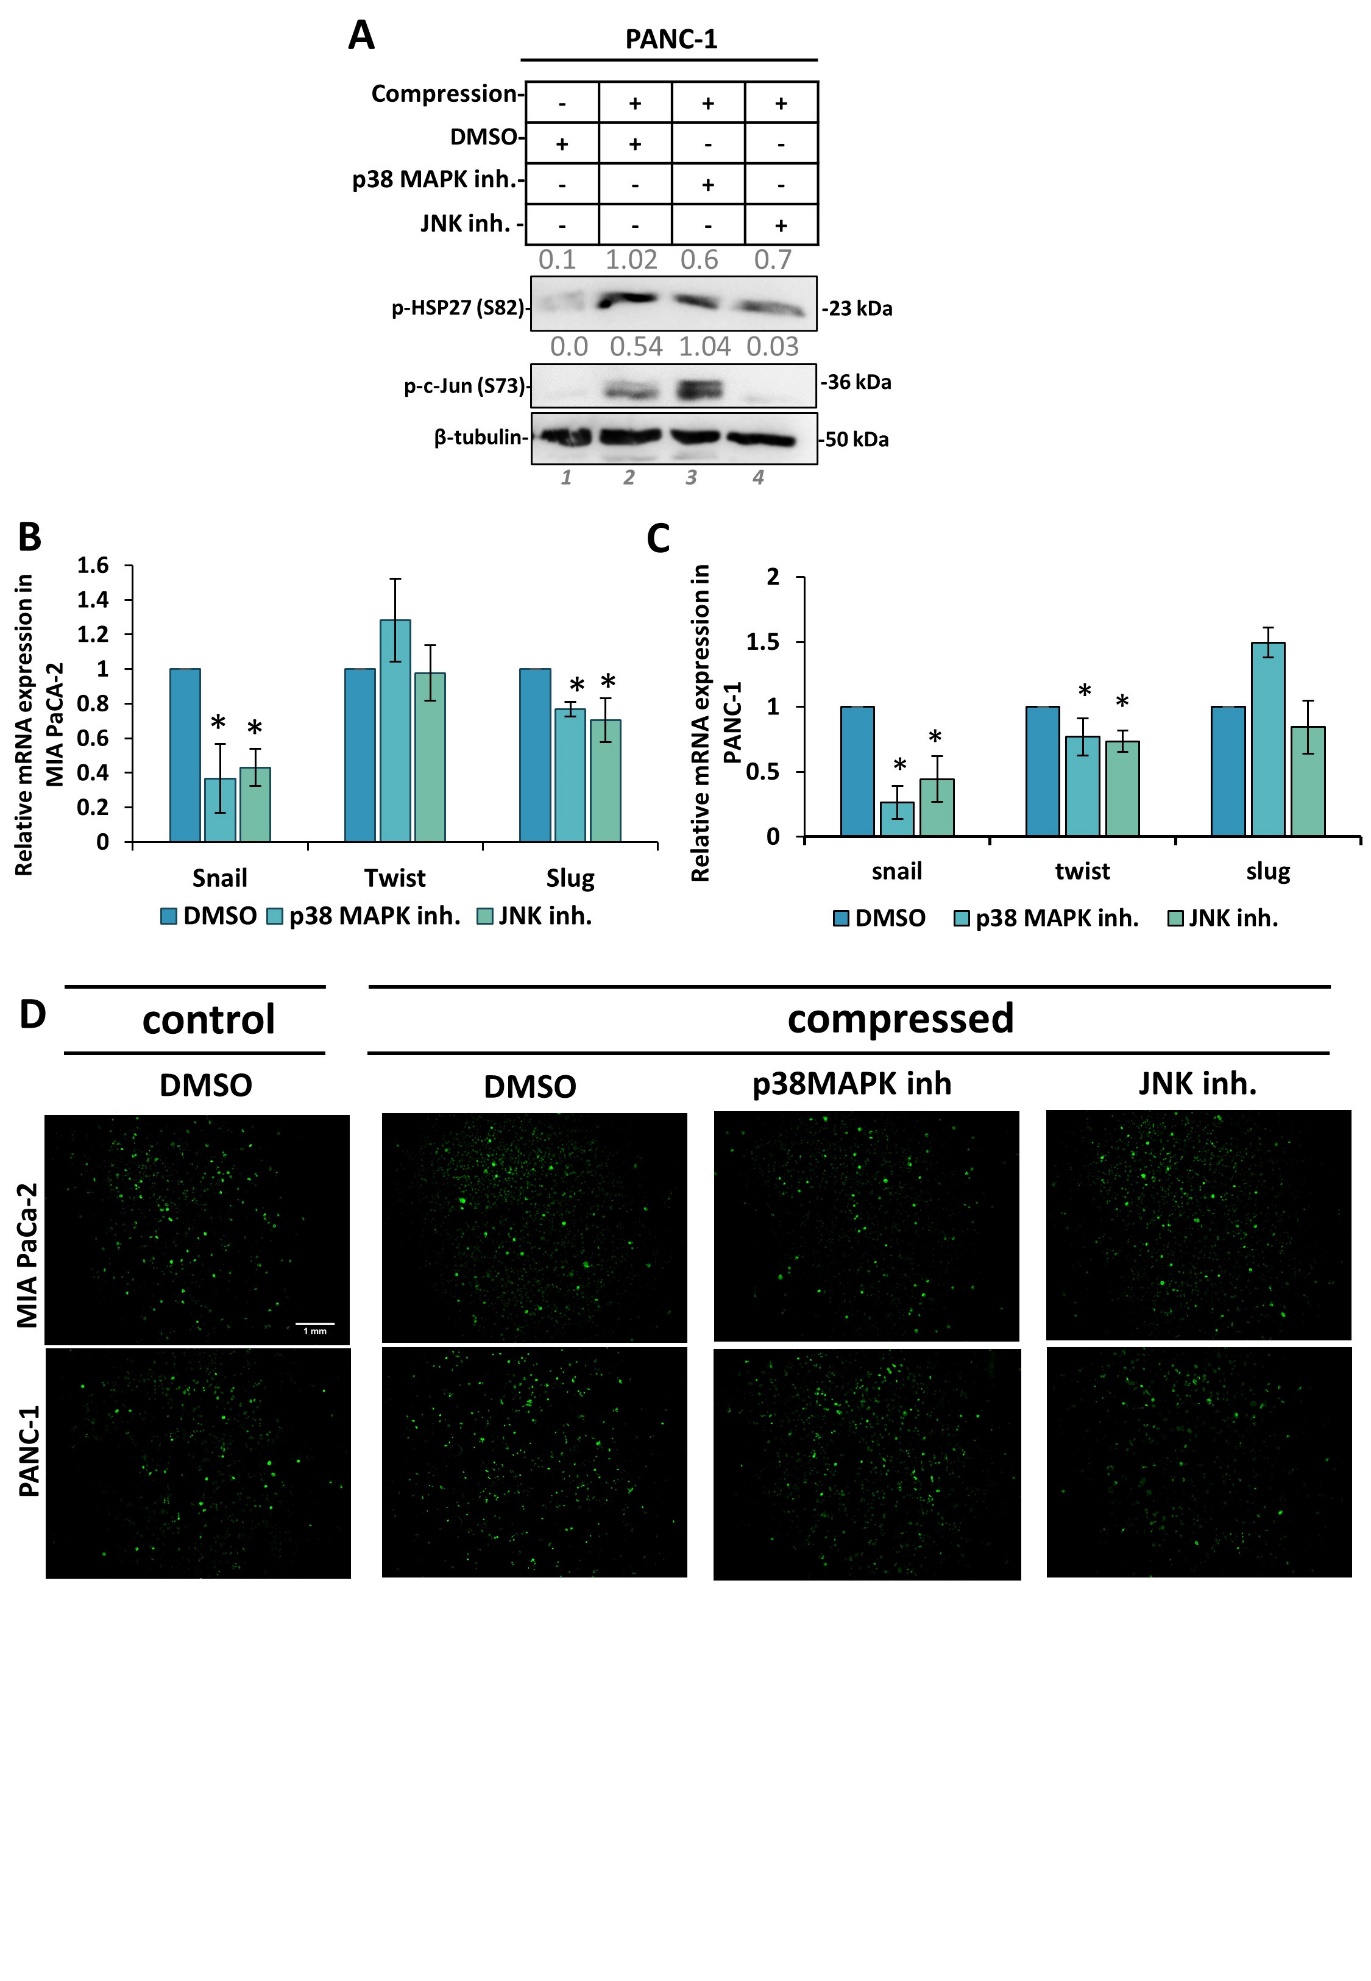


**Supplementary Figure 7** **A**, Representative Immunoblotting showing phosphorylated HSP27 (Ser 82) and c-Jun (S73) in control andcompressed PANC-1 cells treated with 15 μΜ of each inhibitor or equal volume of DMSO. Antibody against β-actin was used as a loading control. Quantification of each antibody compared to loading control was quantified by ImageJ and it is indicated by numbers in grey font. **B-C**, qPCR was used to quantify the mRNA levels of EMT markers in compressed MIA PaCa-2 (B) and PANC-1 (C) cells treated with 15 μΜ of each inhibitor compared to compressed cells treated with DMSO.ΔΔCt method was used to quantify the gene expression in each sample using as a reference the expression in compressed and treated with DMSO cells. Bar graphs represent the mean fold change ±SE of two biological replicates experiments (n=6) and statistical changes are indicated with an asterisk (*) (p<0.05 in student t test). **D**, Representative images of Ki67 staining in MIA PaCa-2 and PANC-1 uncompressed (DMSO) and compressed cells (DMSO+4 mmHg), and compressed cells treated with p38 MAPK or JNK inhibitors. Scale bar: 1mm.


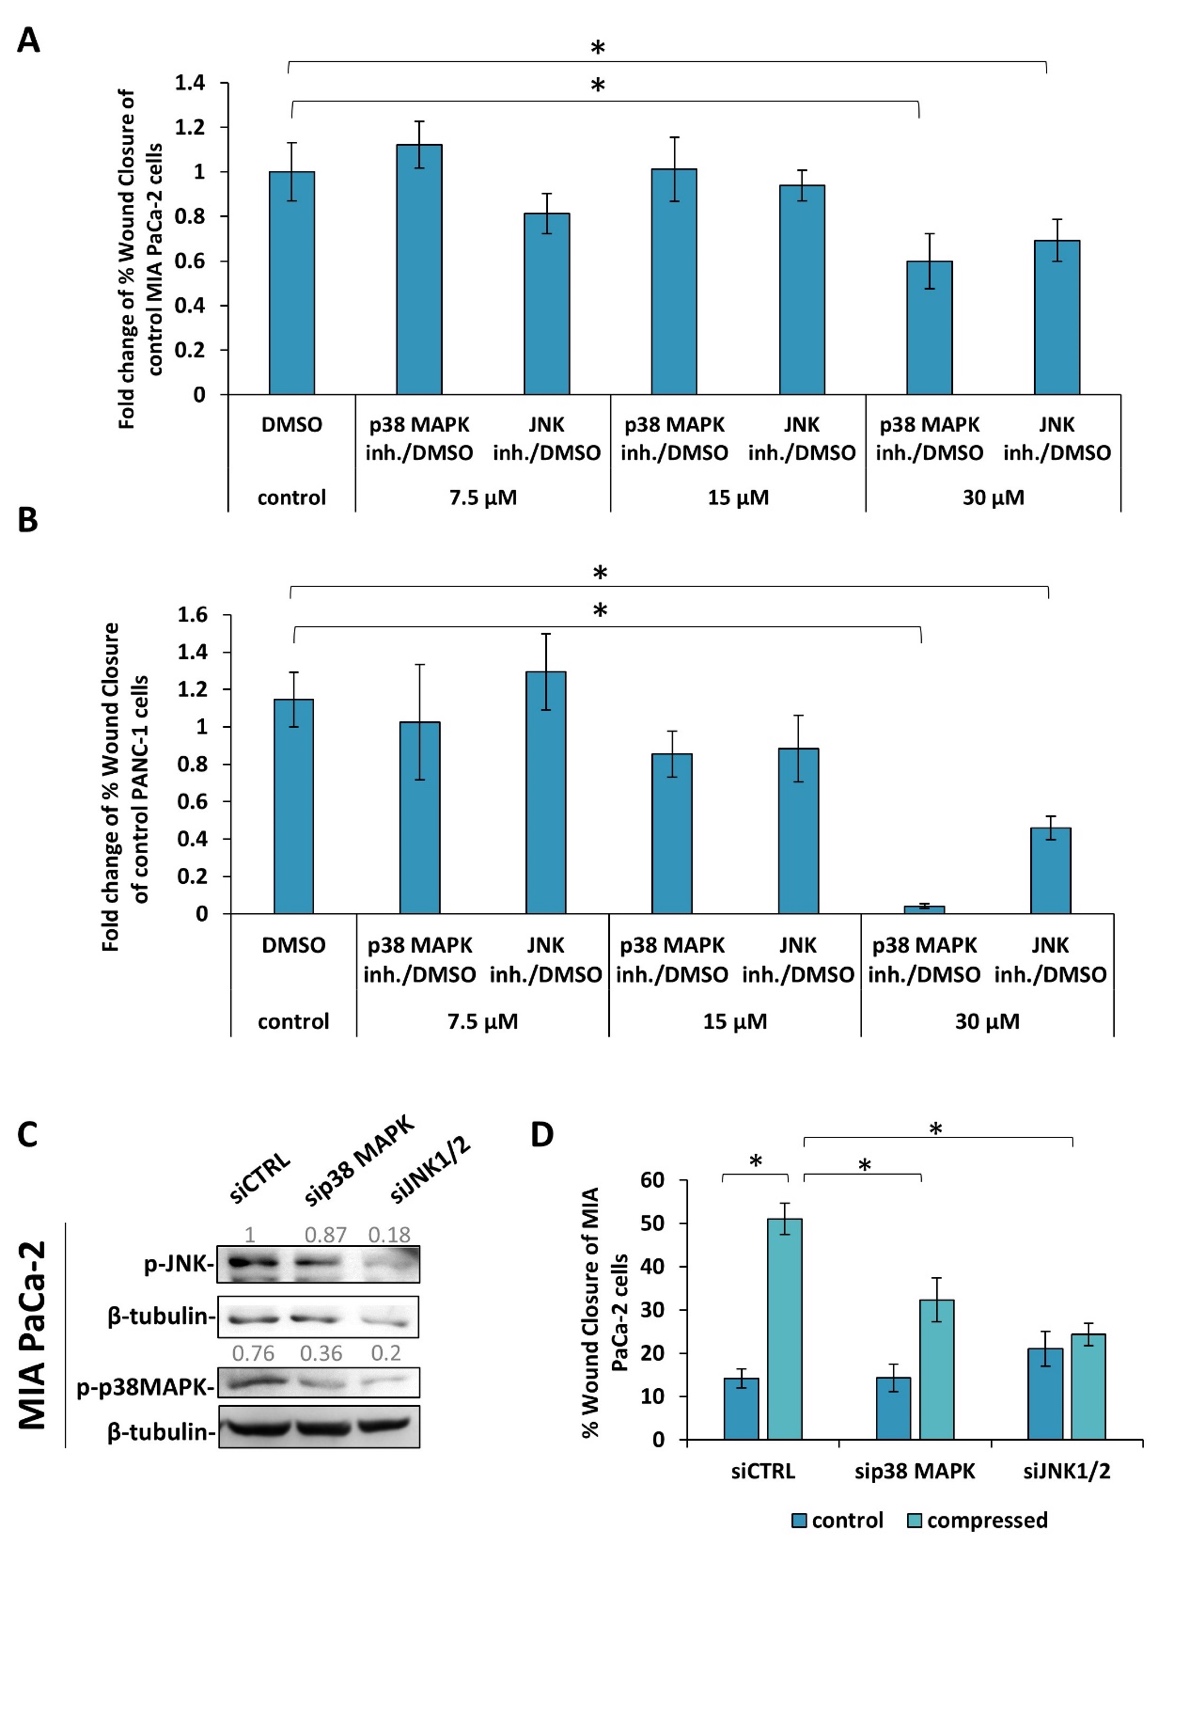


**Supplementary Figure 8.** **A-B**, MIA PaCa-2 and PANC-1 cells were treated with DMSO, p38 MAPK inhibitor (SB202190) or JNK inhibitor (SP600125) at 7.5-, 15- and 30 μΜ in low-serum- containing DMEM and then subjected to a scratch assay for 16 hours. Graphs showing the average percentage ±SE wound closure of MIA PaCa-2 (A) and PANC-1 (B) as quantified using ImageJ software. Statistically significant differences in wound closure of treated with inhibitors MIA PaCa-2 or PANC-1 cells compared to DMSO-treated cells is indicated with an asterisk (*) (2 biological replicates; n≥6; p<0.05 in student’s t test). **C,** Immunoblotting showing phosphorylated levels of JNK and p38 MAPK in MIA PaCa-2 cells treated with siCTRL-, sip38 MAPK- or siJNK1/2. Numbers in grey font represent the quantification of each protein normalized to β-tubulin. **D,** MIA PaCa-2 cells were treated with siRNA against p38 MAPK (sip38 MAPK) or co-treated with siRNA against JNK1 & JNK2 (siJNK1/2) and then subjected to a scratch wound healing assay for 16 hours under 0.0 or 4.0 mmHg of compression in 2 % FBS containing DMEM. Control cells were treated with stealth siRNA (siCTRL). Graph showing the average percentage ±SE of wound closure from a representative experiment of MIA PaCa-2 as quantified using ImageJ software. Statistically significant differences are indicated with an asterisk (*) (n≥4; p<0.05 in one-way ANOVA).


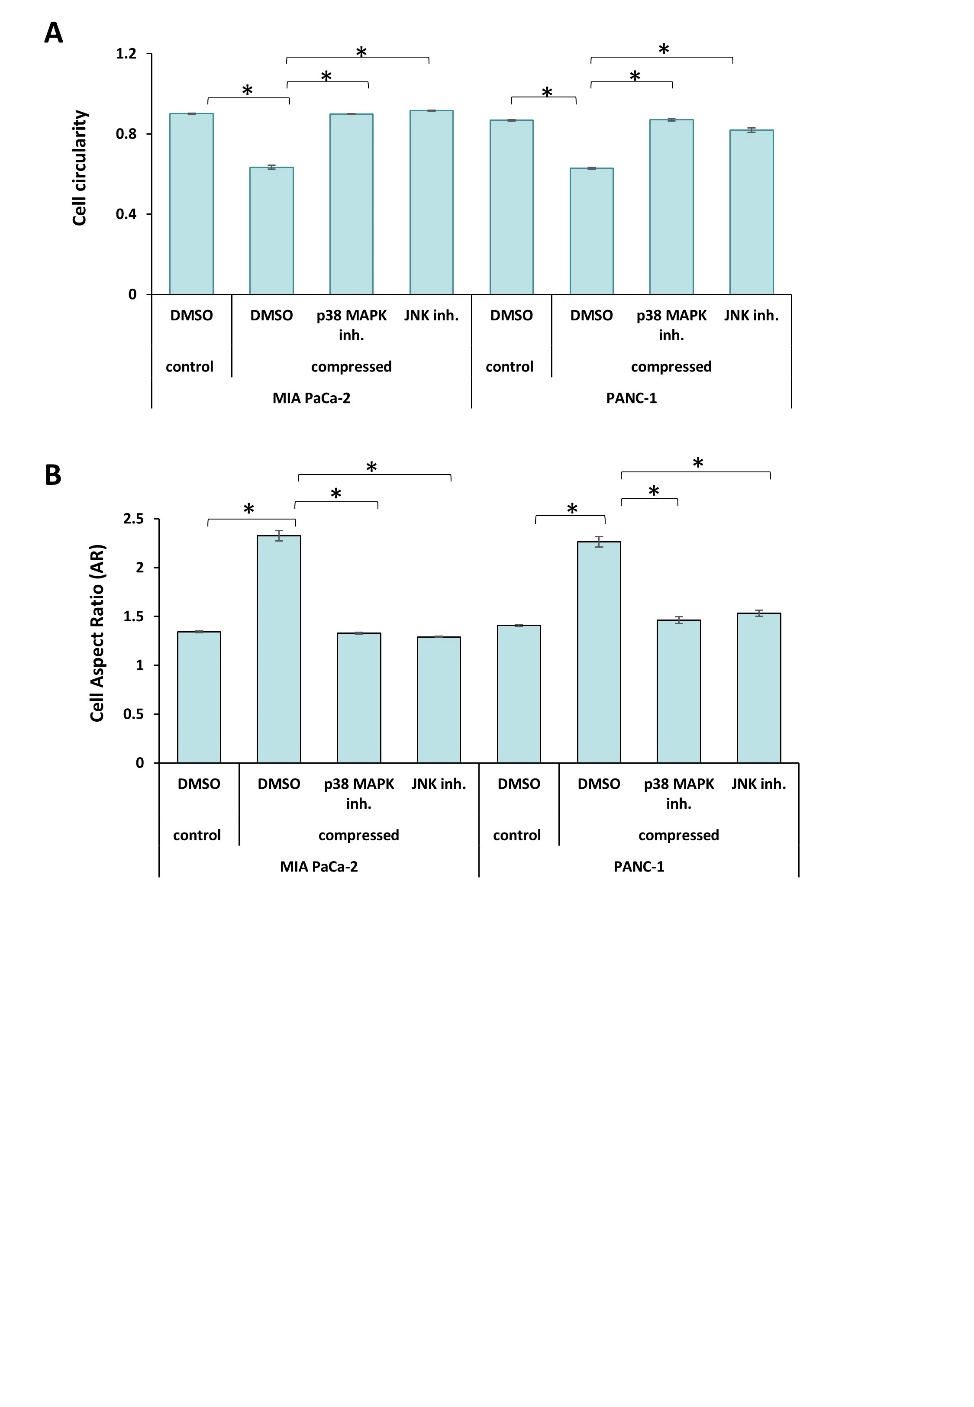


**Supplementary Figure 9**. The average of cell circularity **(A)** and aspect ratio **(B)** (major/minor axis of the cell) was quantified by ImageJ. For cell circularity a value of 1.0 indicates a perfect circle. Asterisk (*) indicates a statistically significant difference (p<0.05 in one-way ANOVA analysis; n≥25).


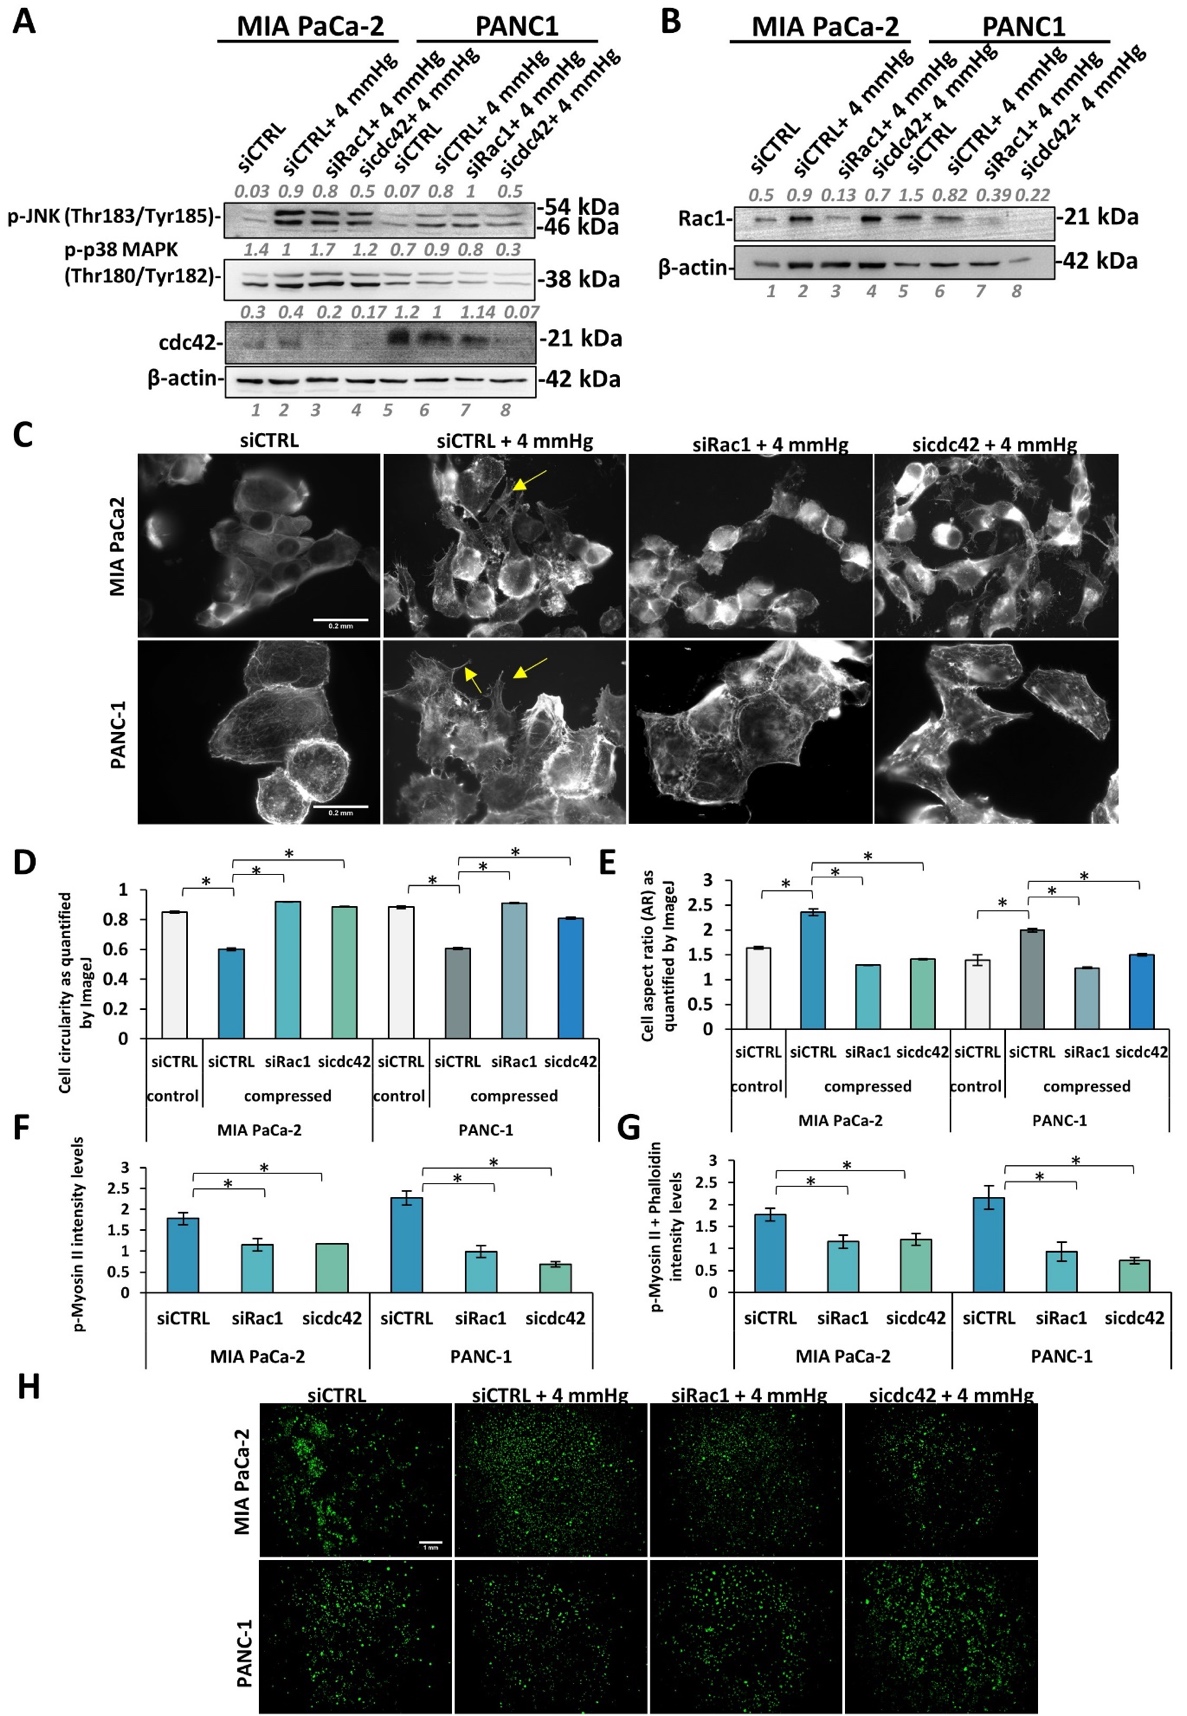


**Supplementary Figure 10. A,** Representative immunoblotting in control and compressed MIA PaCa-2 and PANC-1 treated with siCTRL, siRac1 or sicdc42 for the detection of the phosphorylated levels of JNK (Thr183/Tyr185), p38 MAPK (Thr180/Tyr182) and total levels of cdc42. Antibody against β-actin was used as a loading control. Quantification of each antibody compared to loading control was performed by ImageJ and it is indicated by numbers in grey font. **B**, Representative immunoblotting in control and compressed MIA PaCa-2 and PANC-1 treated with siCTRL, siRac1 or sicdc42 for the detection of total Rac1 levels. Antibody against β-actin was used as a loading control. Quantification of Rac1 antibody compared to loading control was quantified by ImageJ and it is indicated by numbers in grey font. **C,** Representative images of phalloidin staining in control and compressed MIA PaCa-2 and PANC-1 cells treated with siCTRL, siRac-1 or sicdc42. Red arrows indicate cell protrusions that facilitate cell migration. Scale bar 0.2 mm. **D-E**, The average cell circularity (**D**) and aspect ratio **(E)** (major/minor axis of the cell) was quantified by ImageJ. For cell circularity a value of 1.0 indicates a perfect circle. Asterisk (*) indicates a statistically significant difference (p<0.05 in one-way ANOVA analysis, n≥25). **F-G,** The average of p-Myosin II **(F)** and p-Myosin II+phalloidin **(G)** areafraction normalized to DAPI area fraction in control and compressed cells was quantified automatically using an in-house code in MATLAB**.** Asterisk (*) indicates a statistically significant difference (p<0.05 in one-way ANOVA analysis). **H,** Representative images of Ki67 staining in uncompressed MIA PaCa-2 and PANC-1 treated with siCTRL and compressed treated with siCTRL, siRac or sicdc42. Scale bar: 1mm.


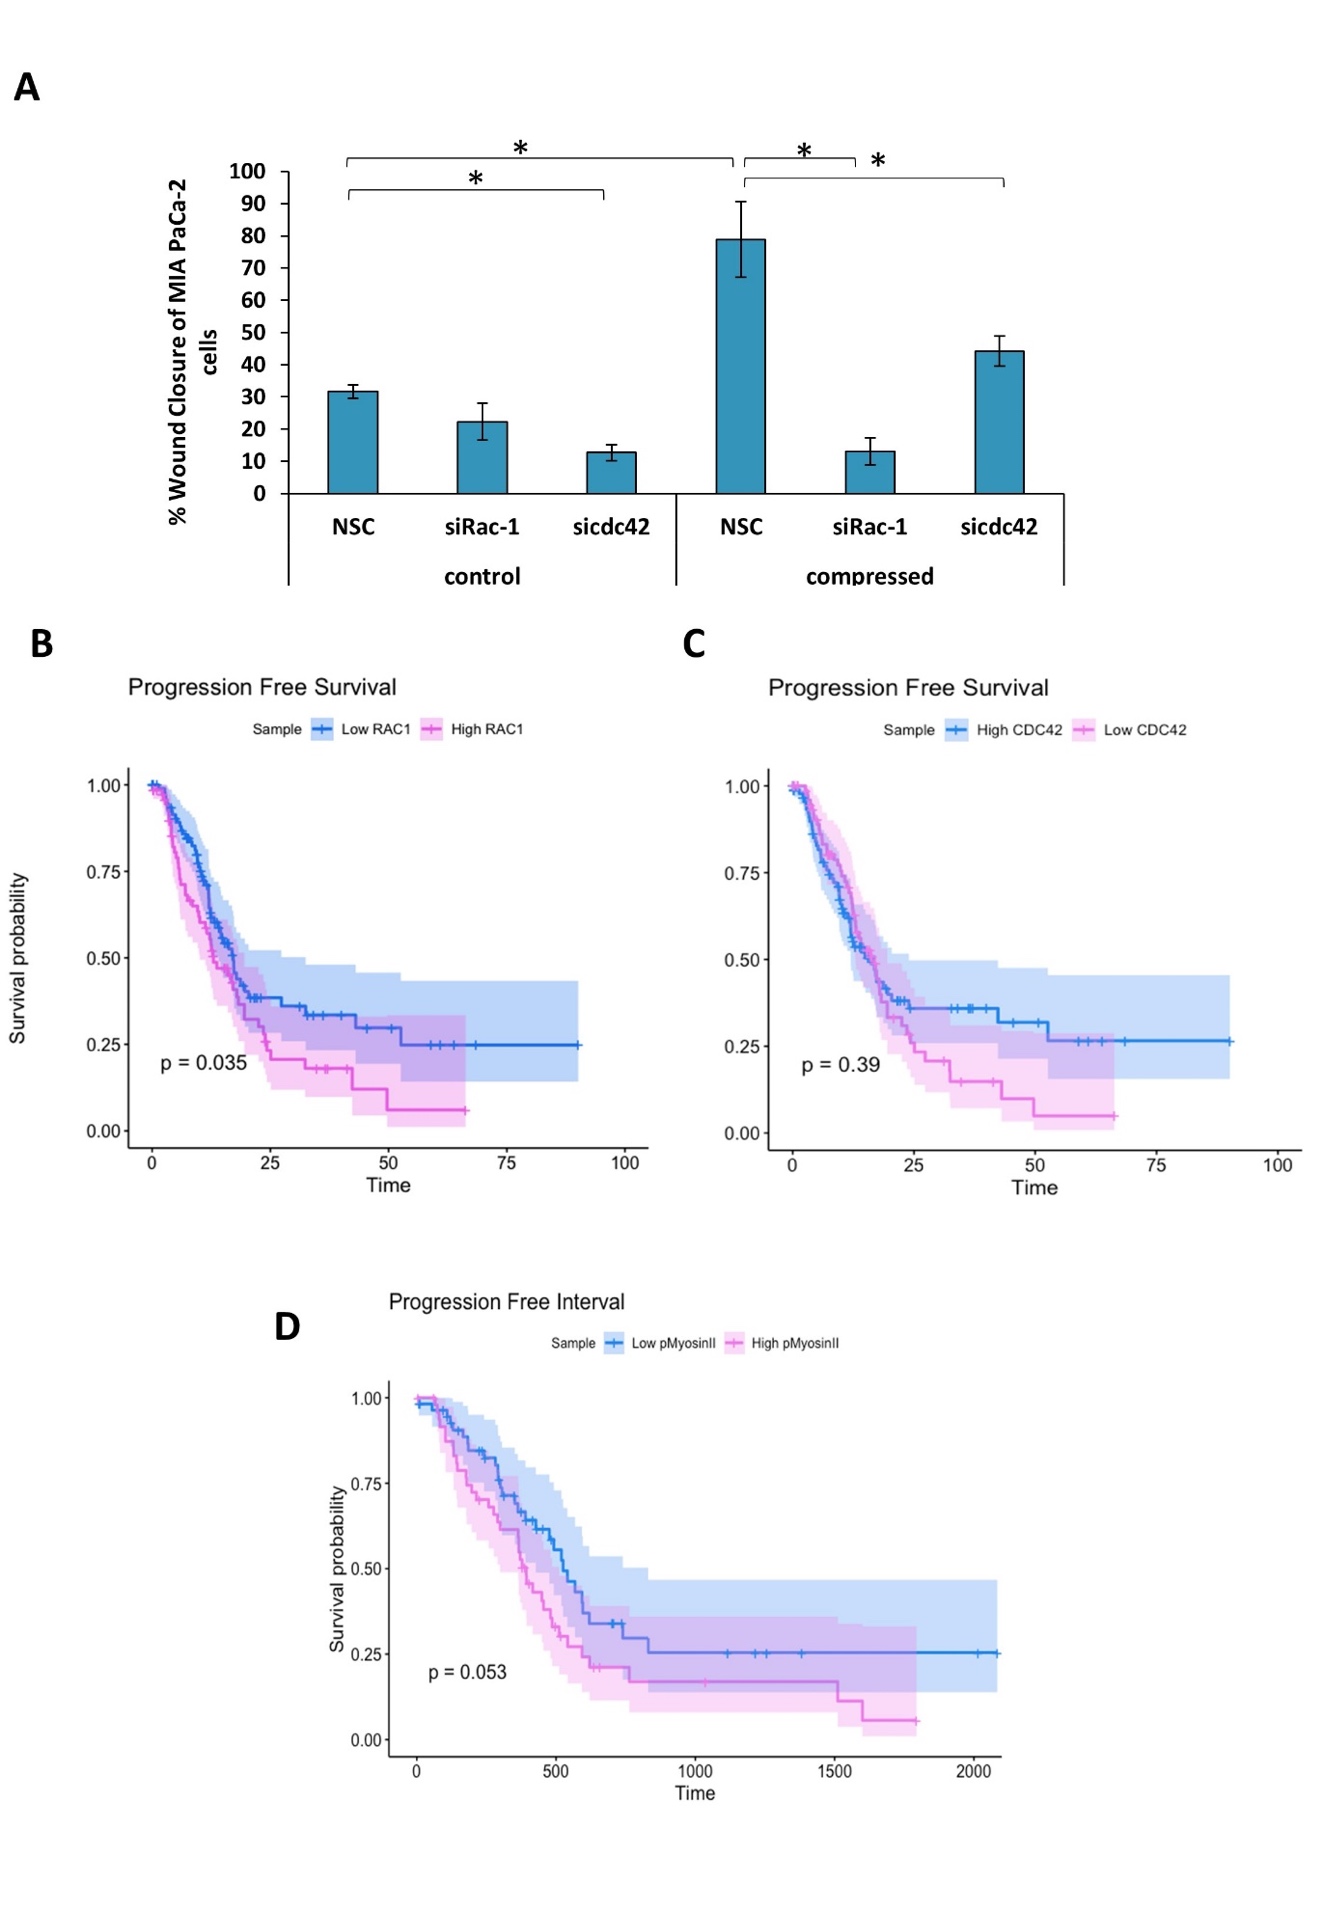


**Supplementary Figure 11.** **A**, MIA PaCa-2 pancreatic cancer cells were treated with siRNA against Rac1 (siRac1) or cdc42 (sicdc42) and then subjected to a scratch wound healing assay for 16 hours under 0.0 or 4.0 mmHg of compression in 2 % FBS containing DMEM. Control cells were treated with stealth siRNA (siCTRL). Graph showing the percentage ±SE wound closure of control and compressed MIA PaCa-2 cells treated with siRAC1 or sicdc42 normalized to siCTRL cells. Statistically significant differences are indicated with an asterisk (*) (1 biological replicate; n≥4; p<0.05 in one-way ANOVA analysis). **B-D**, Kaplan-Meier survivalanalysis for assessment of overall survival (0S) based on tumor Rac1 and cdc42 mRNA expression, and phospho-Myosin II protein expression in patients with pancreatic ductal adenocarcinoma.

**Full-length Immunoblotting Images.**

**Figure 2A**

**-p-HSP27**


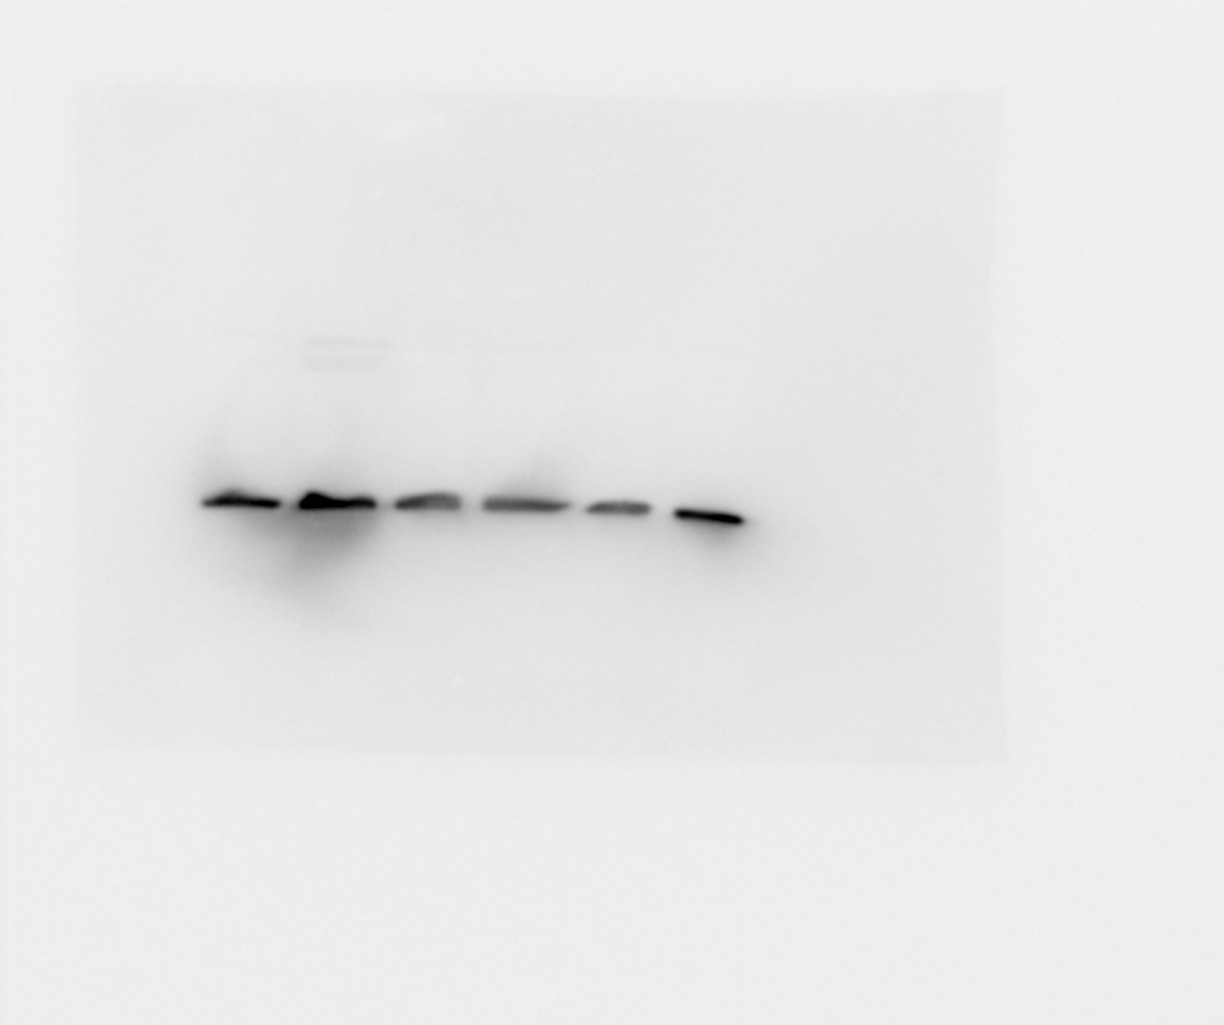


**b-tubulin**


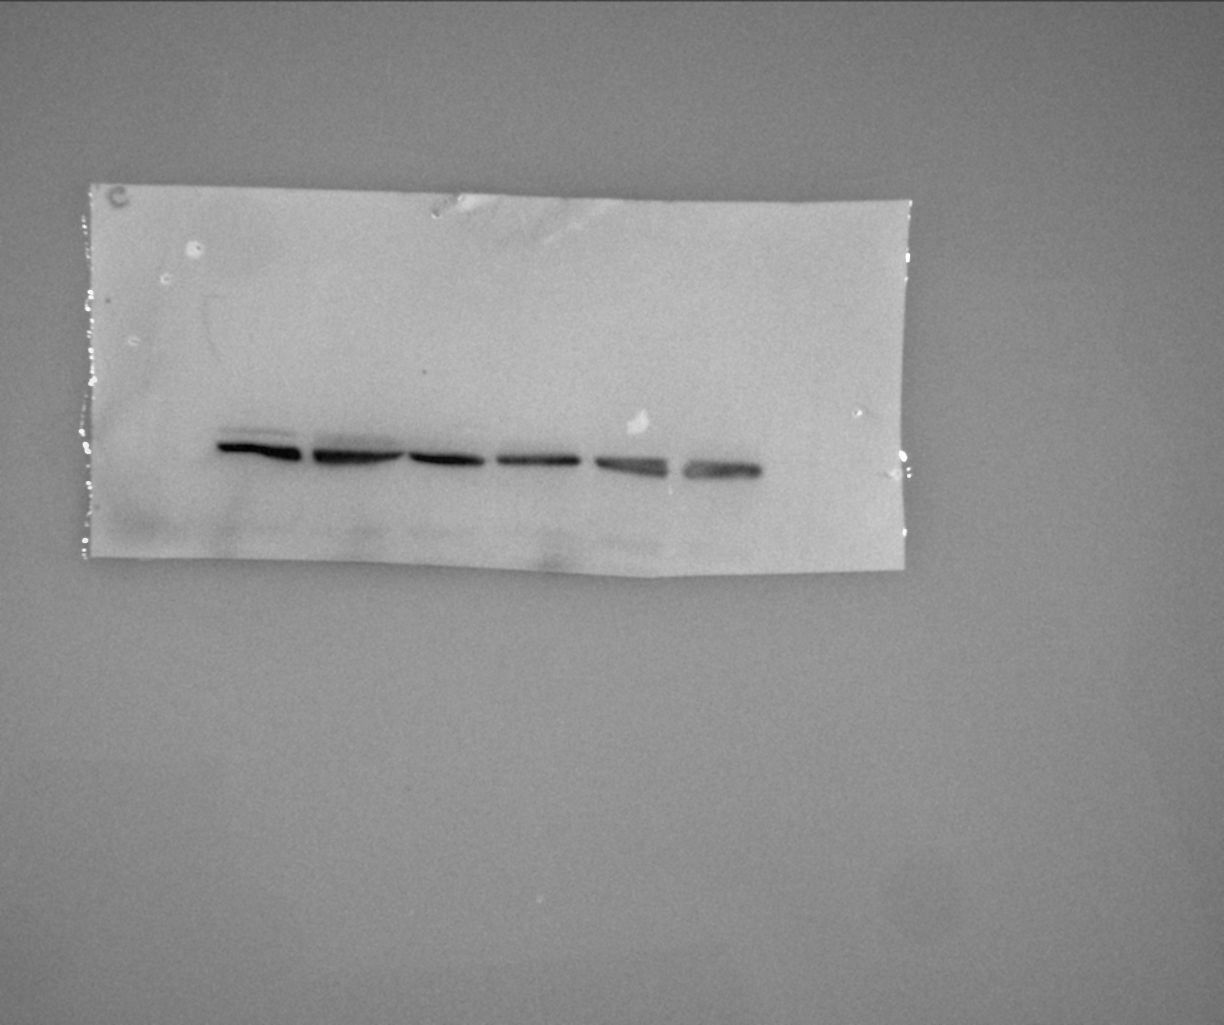


**Figure 2C**

**p-p38 MAPK**


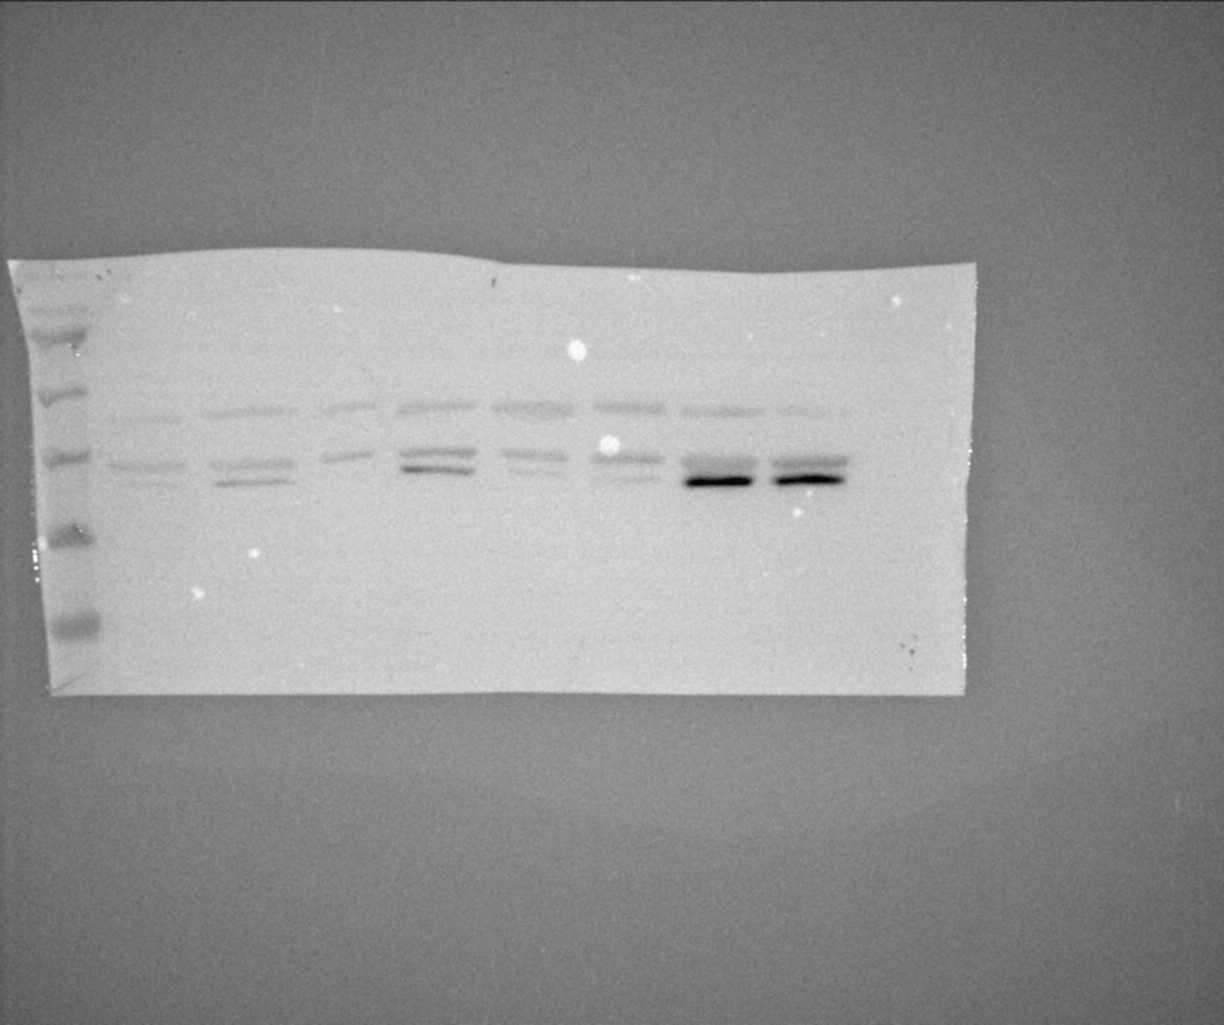


**48kD-**

**-b-tubulin**


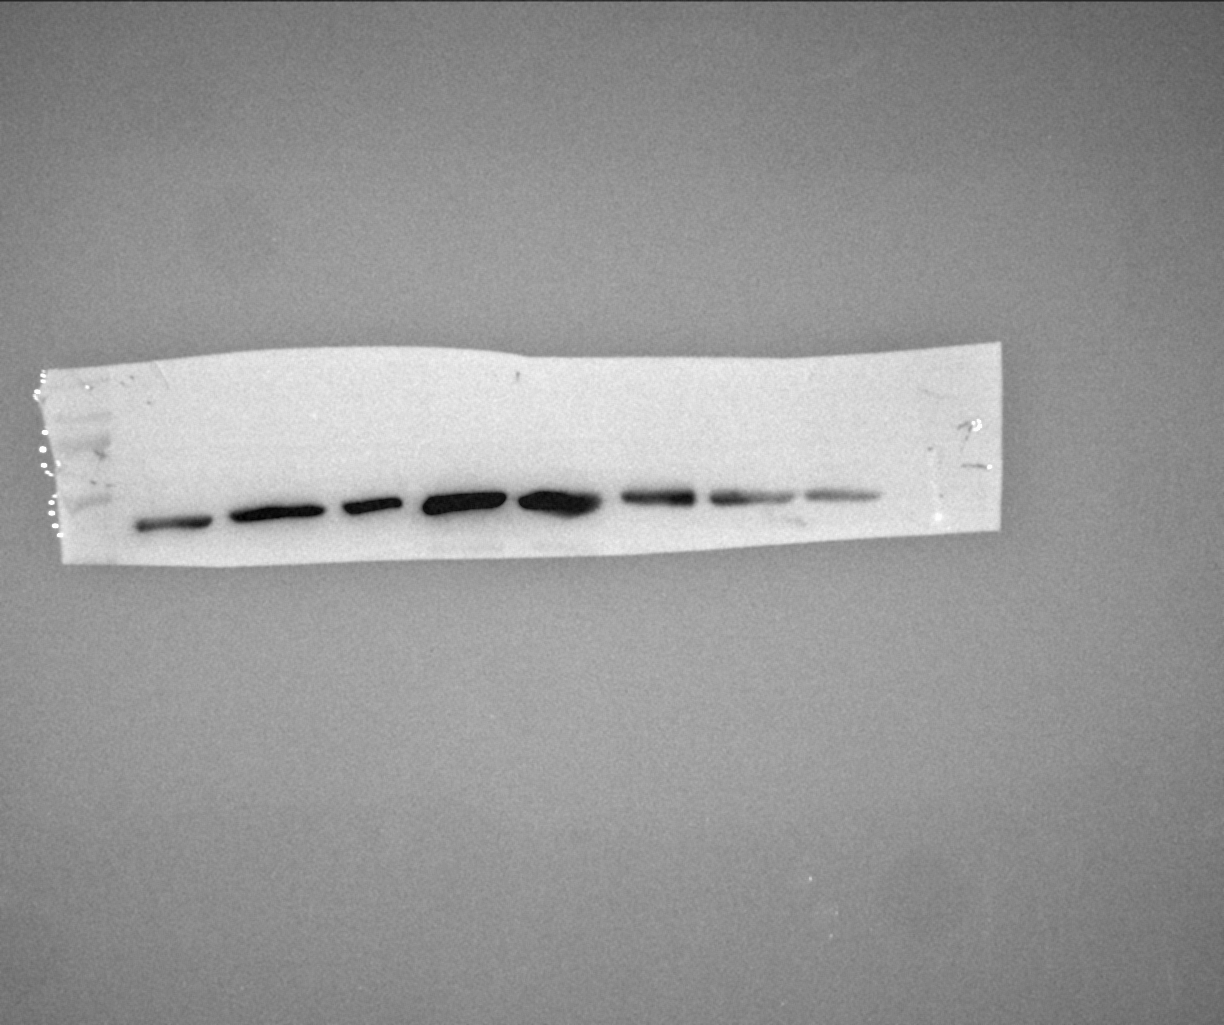


**63kD-**

**Figure 2E**

**-c-Jun**


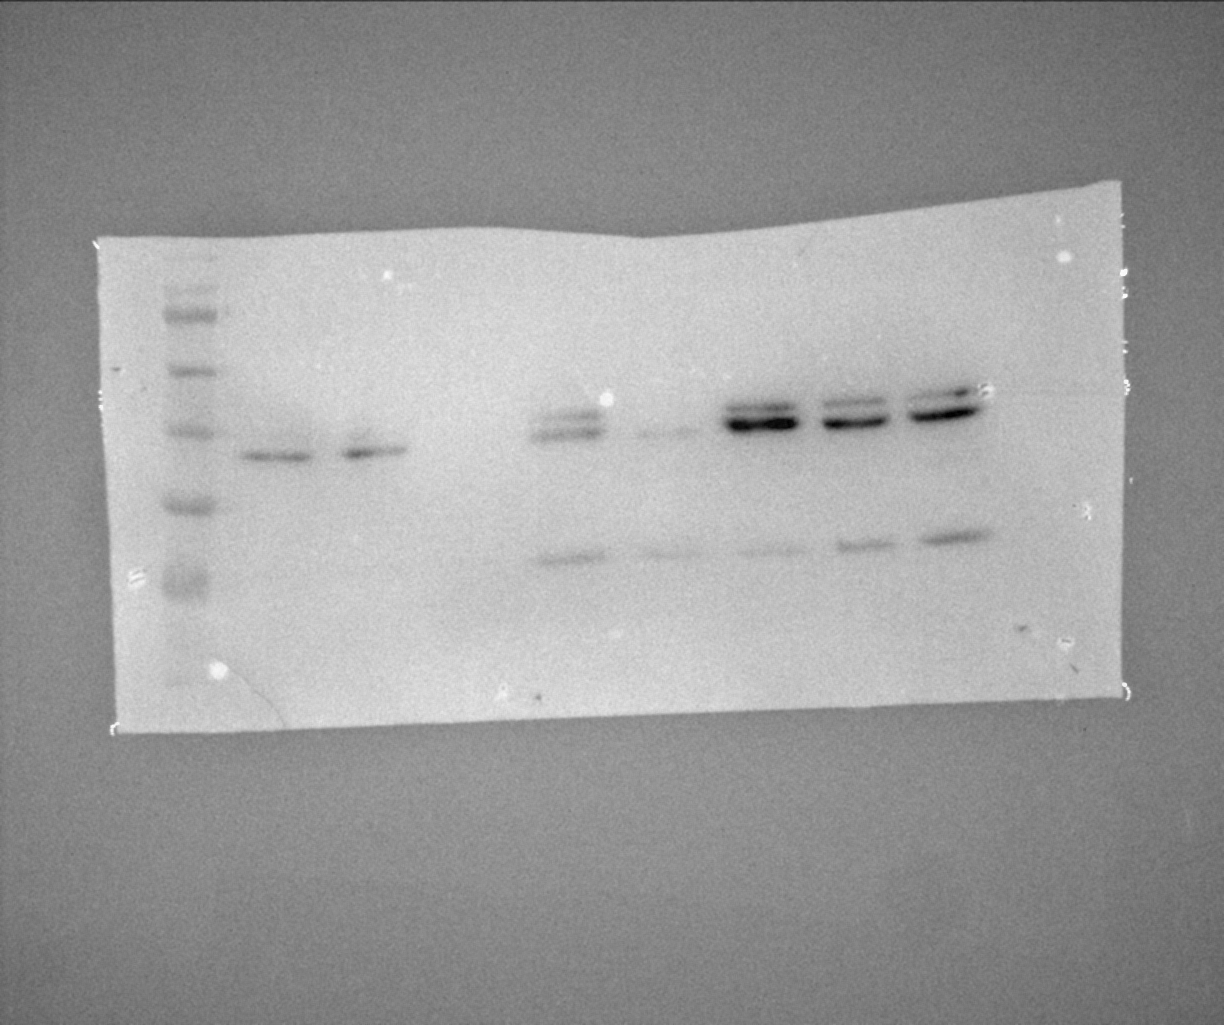


**48kD-**

**-b-tubulin**


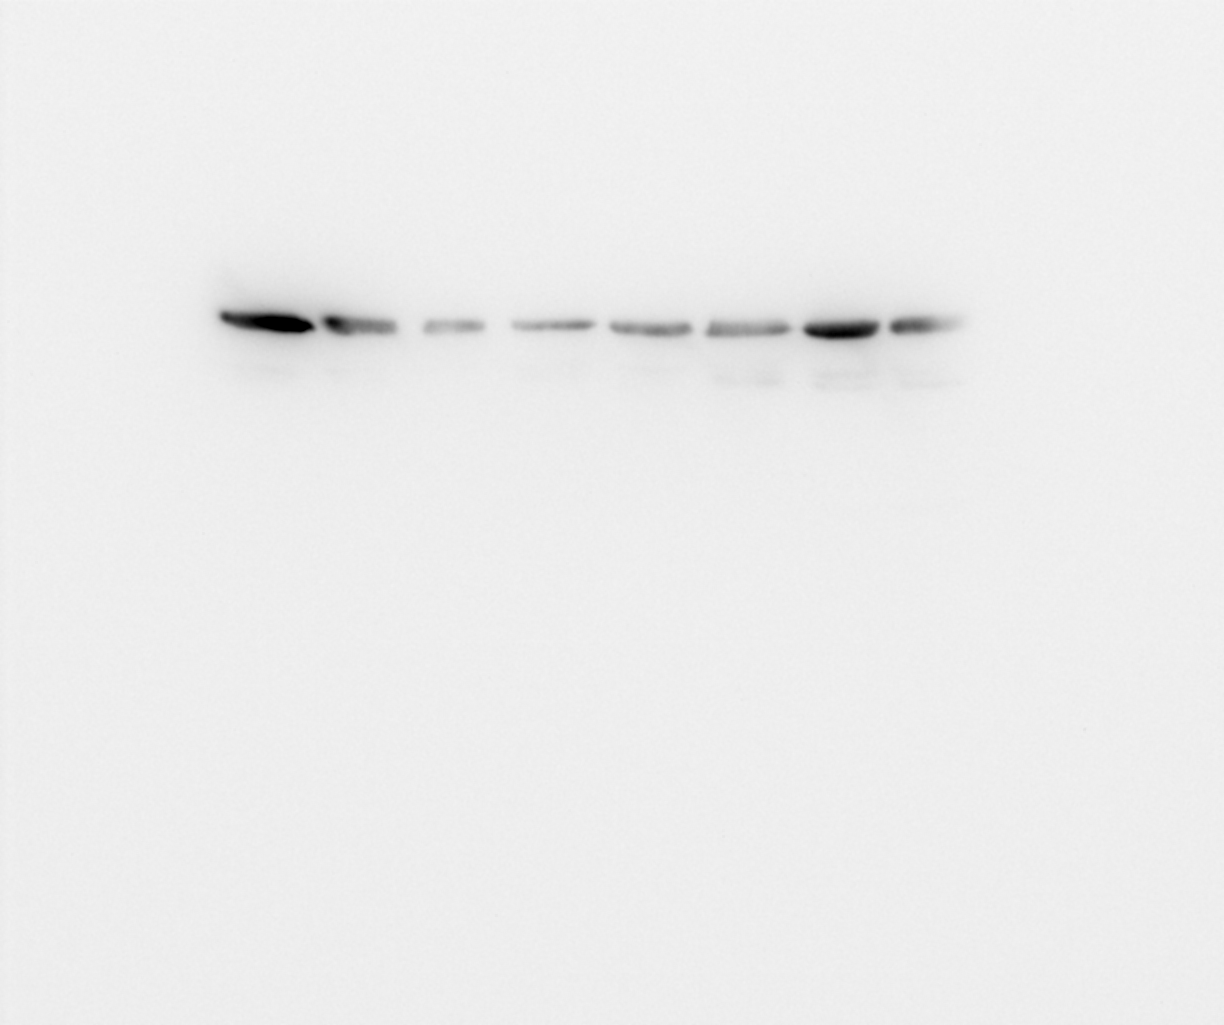


**63kD-**

**Figure 2G**

**-pHSP27**


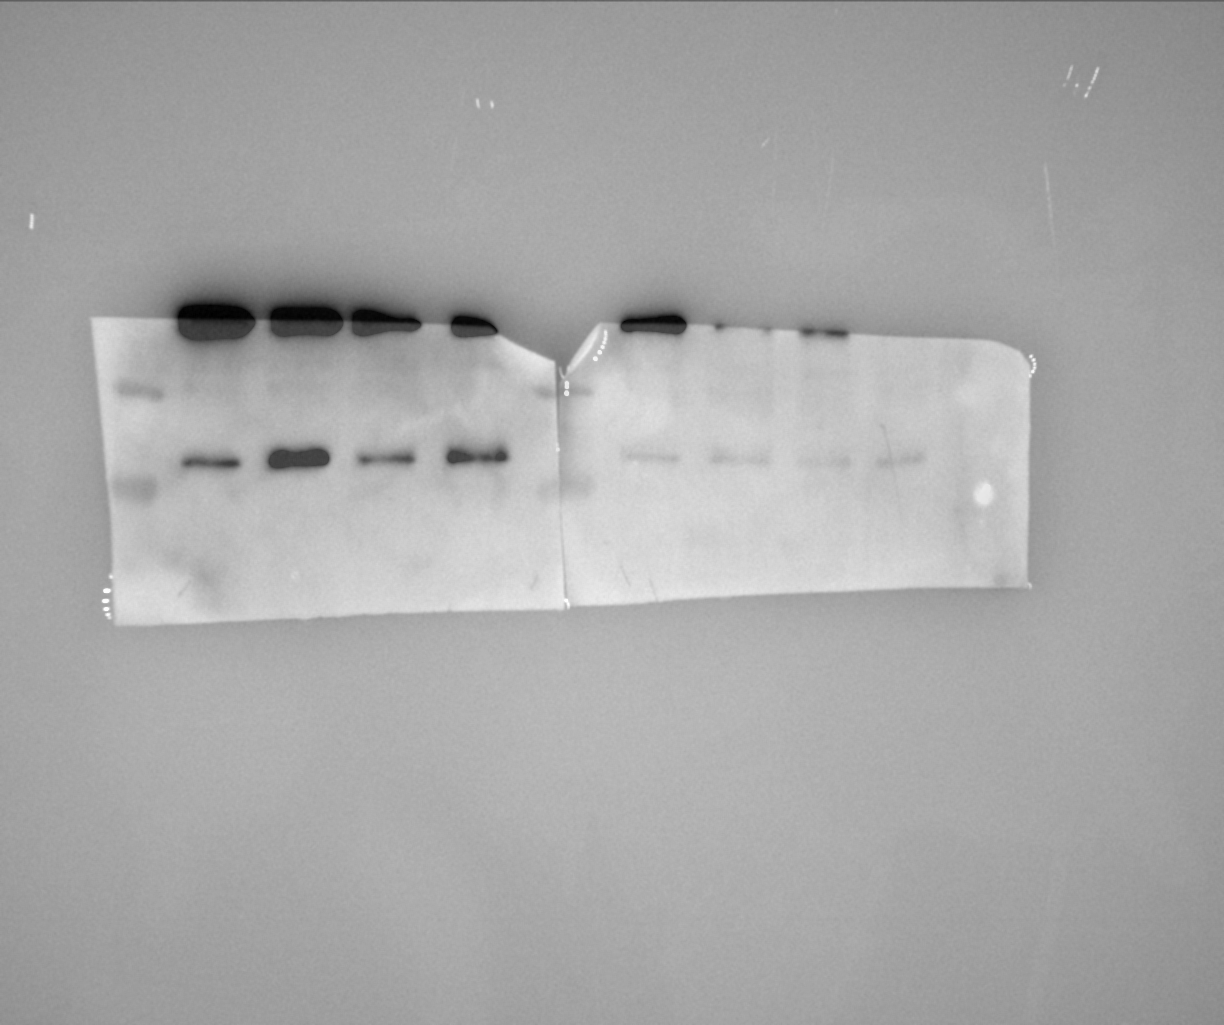


**35kD-**

**-pJNK**


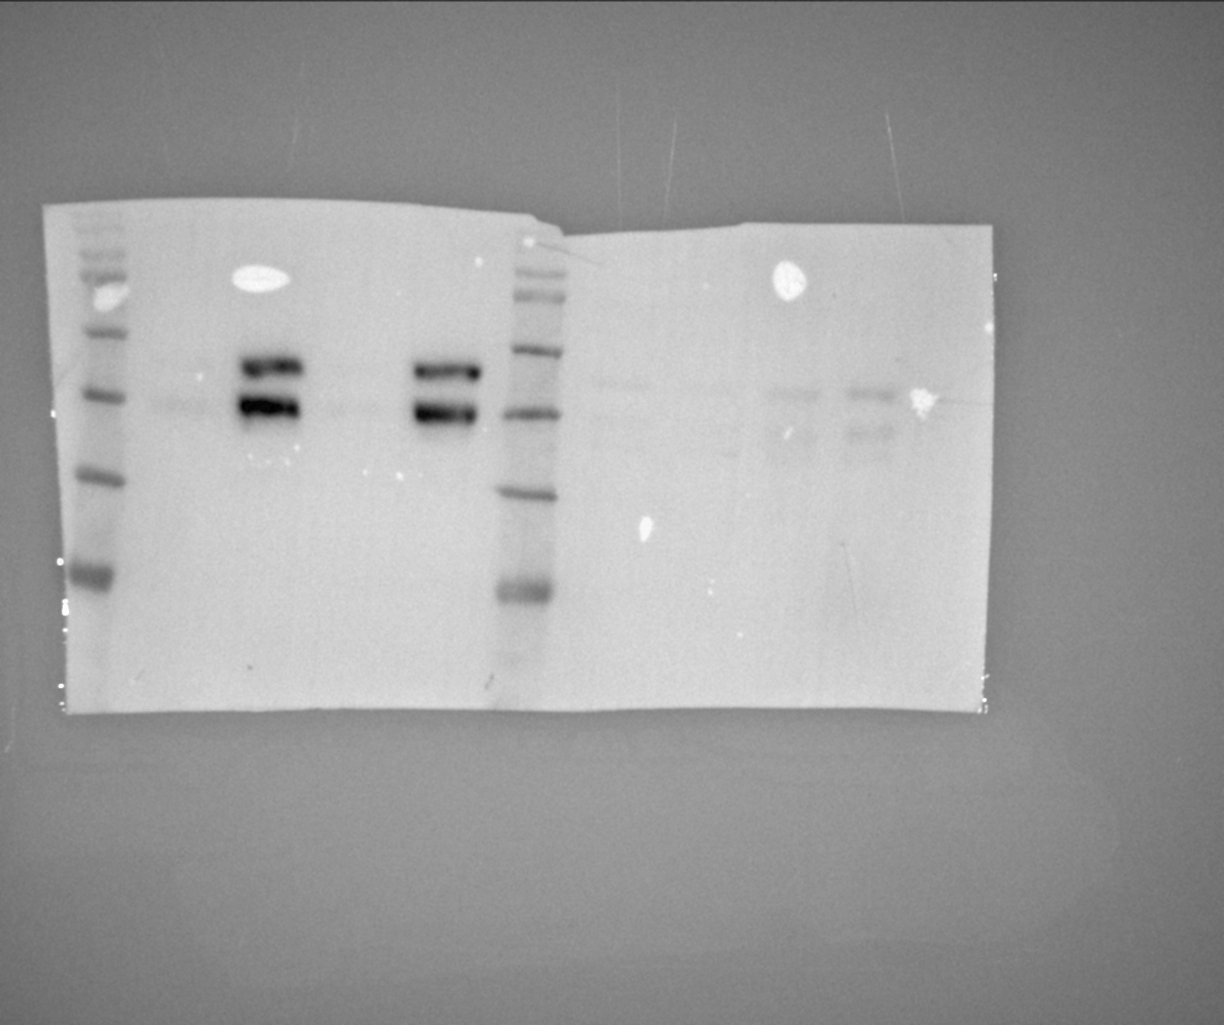


**48kD-**

**-p-p38 MAPK**


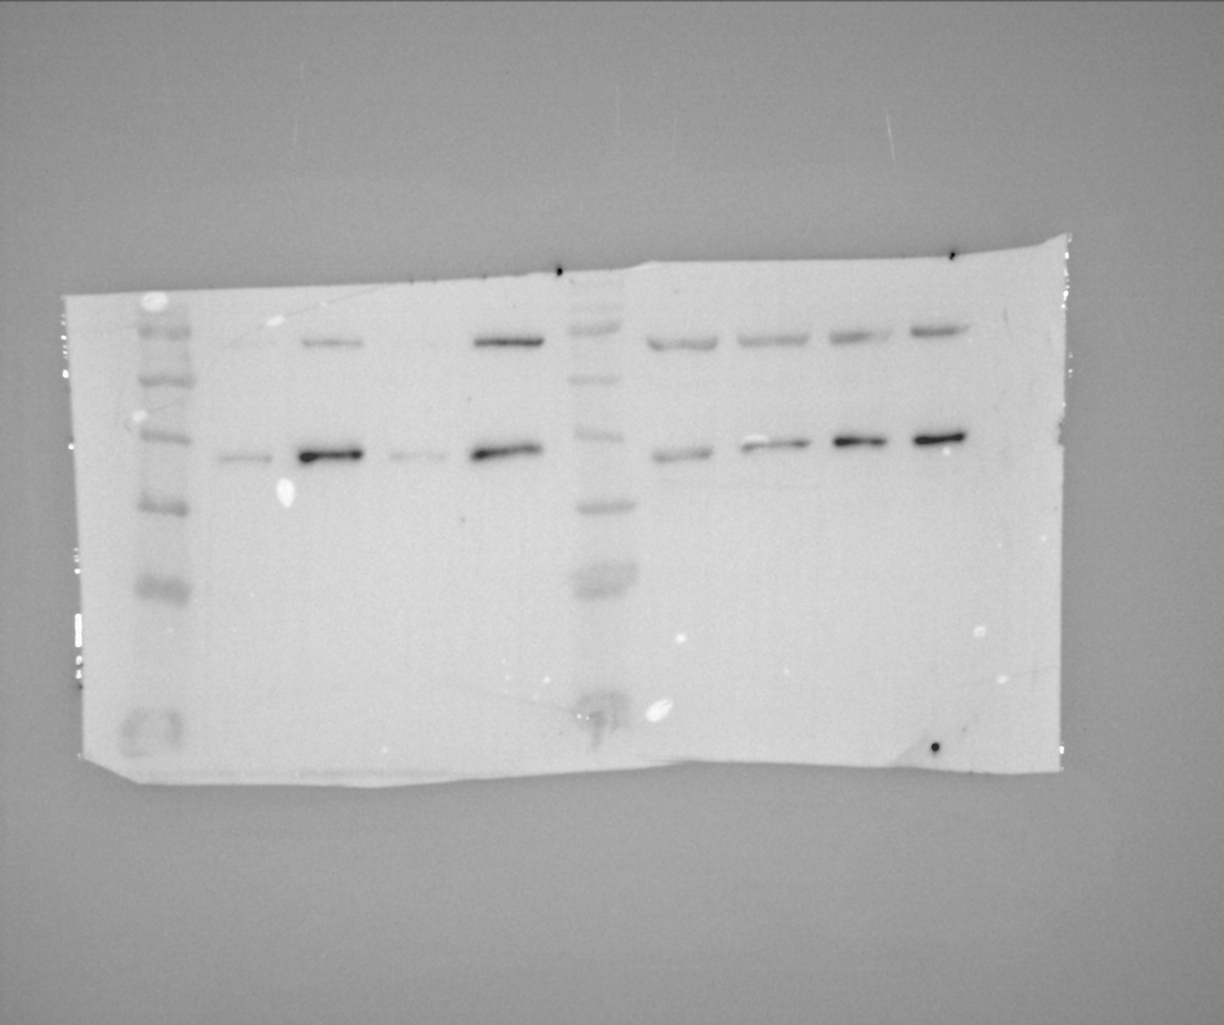


**48kD-**

**-b-tubulin**


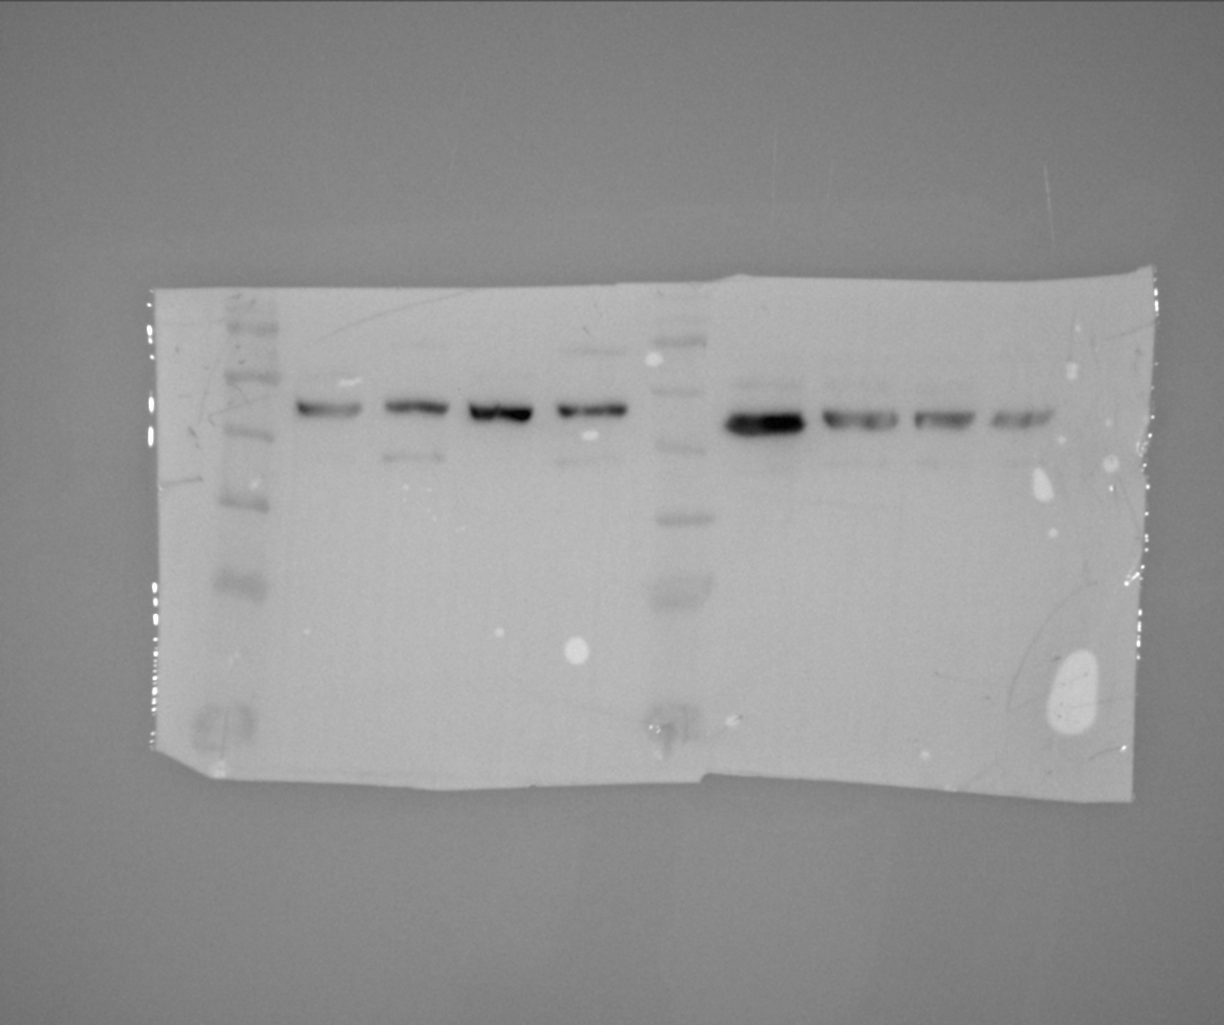


**63kD-**

**Supplementary Figure 3**

**-pJNK**


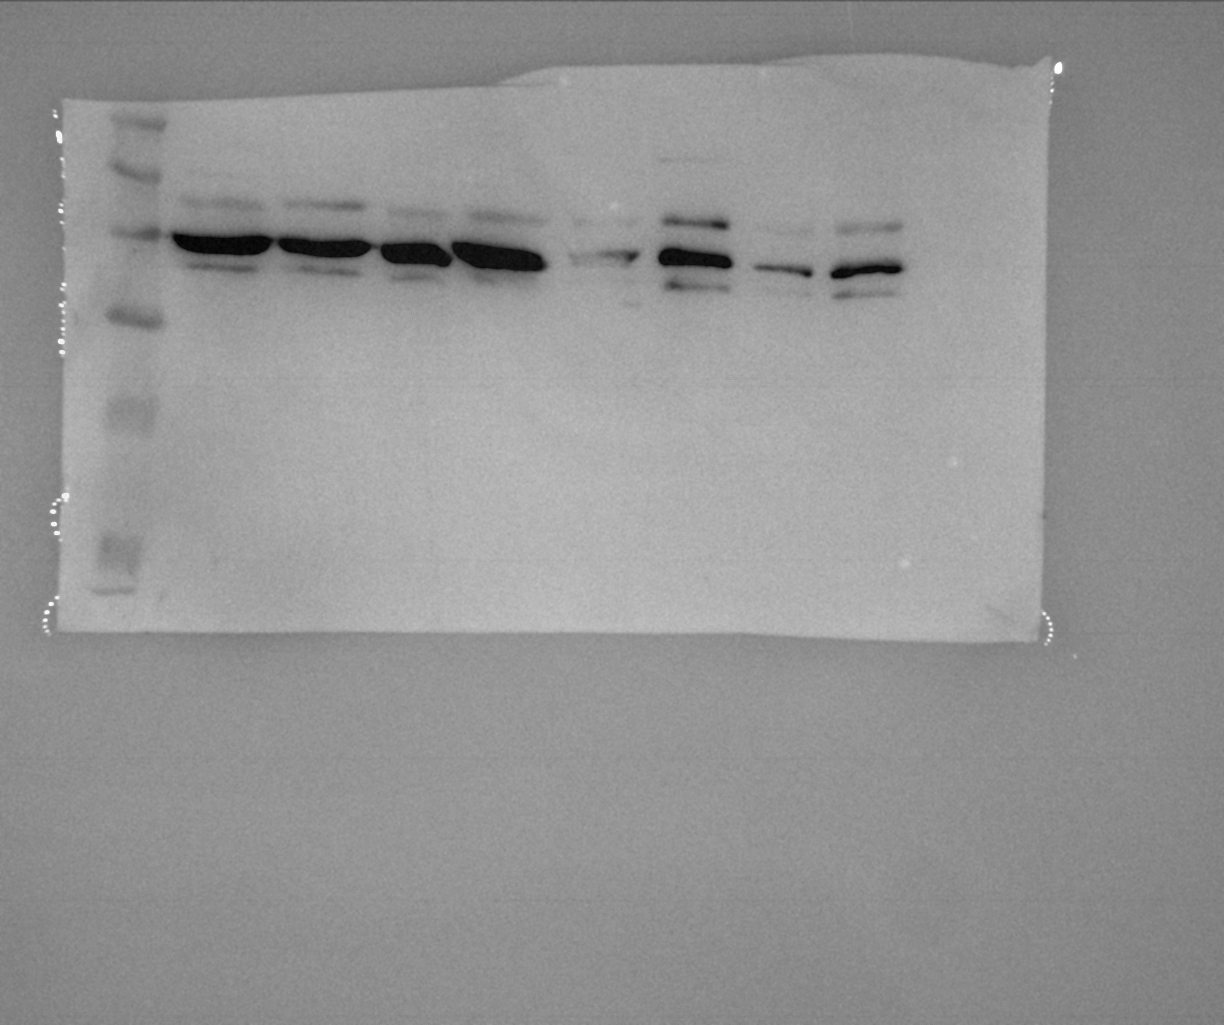


**48kD-**

//////

**-B-TUBULIN**


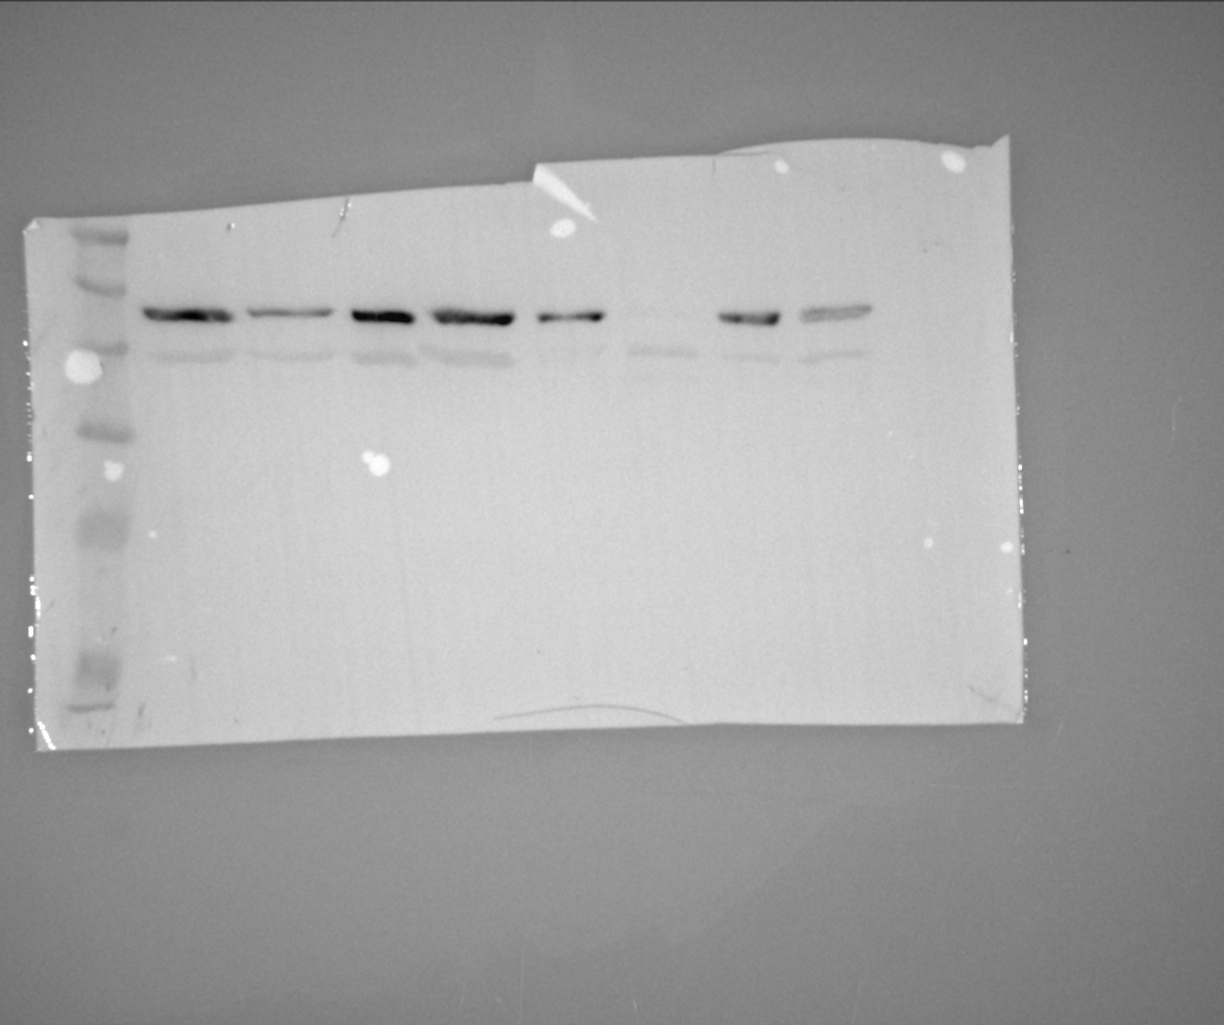


**63kD-**

//////

**Figure 4F**

**-pHSP27 -actin on HSP27**


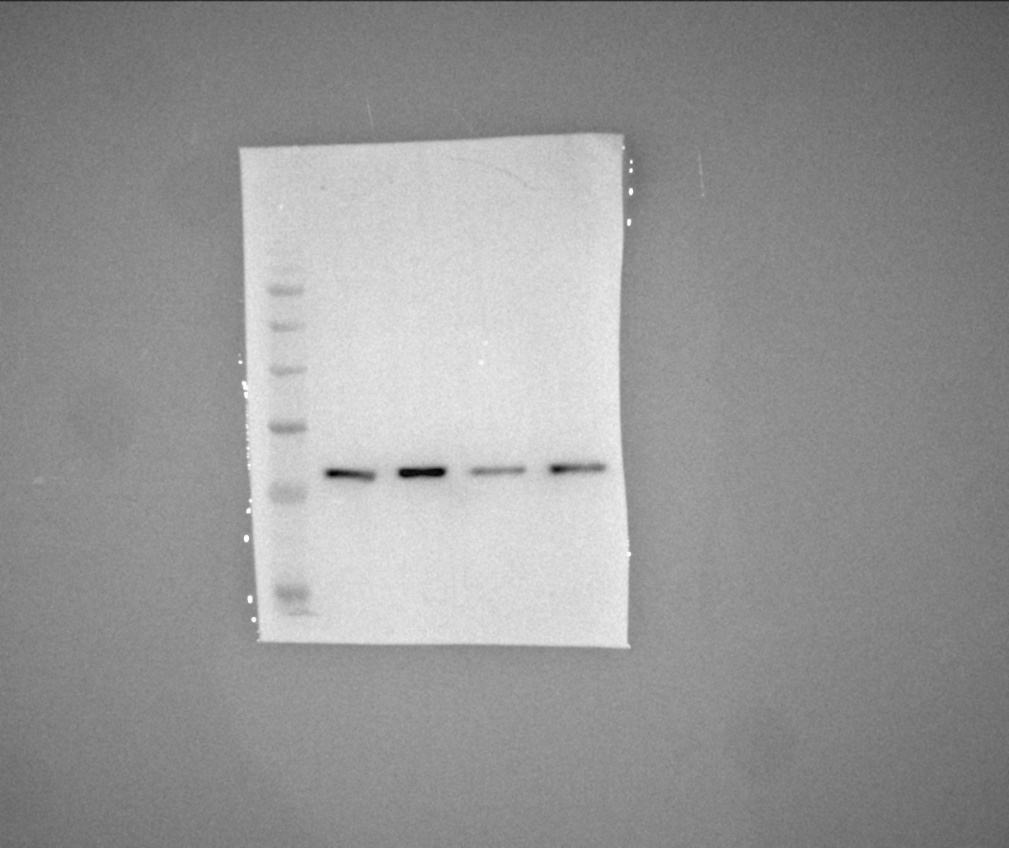

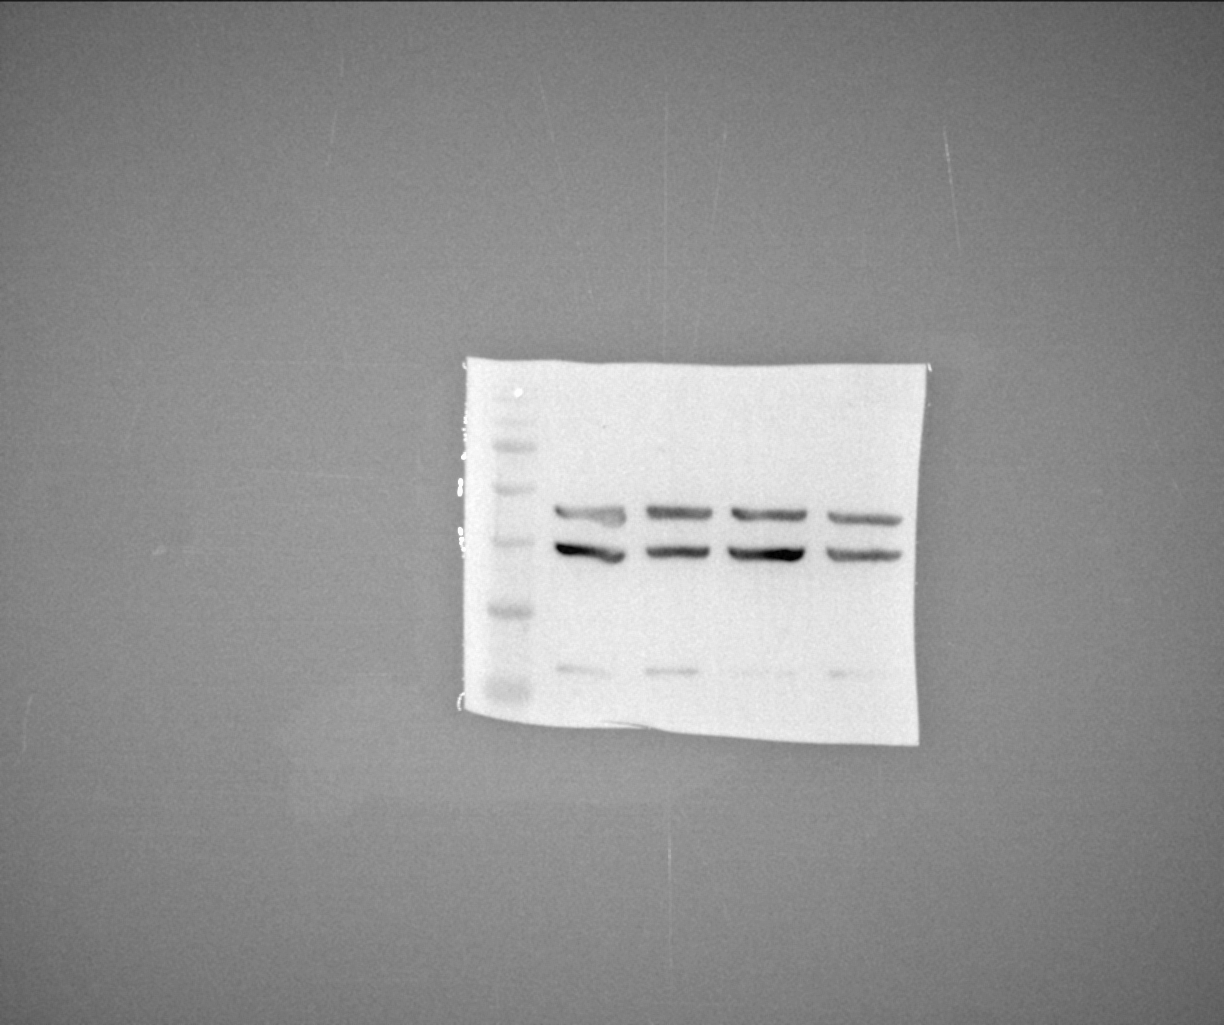


**48kD-**

**35kD-**

**-p-c-Jun Actin on c-Jun**


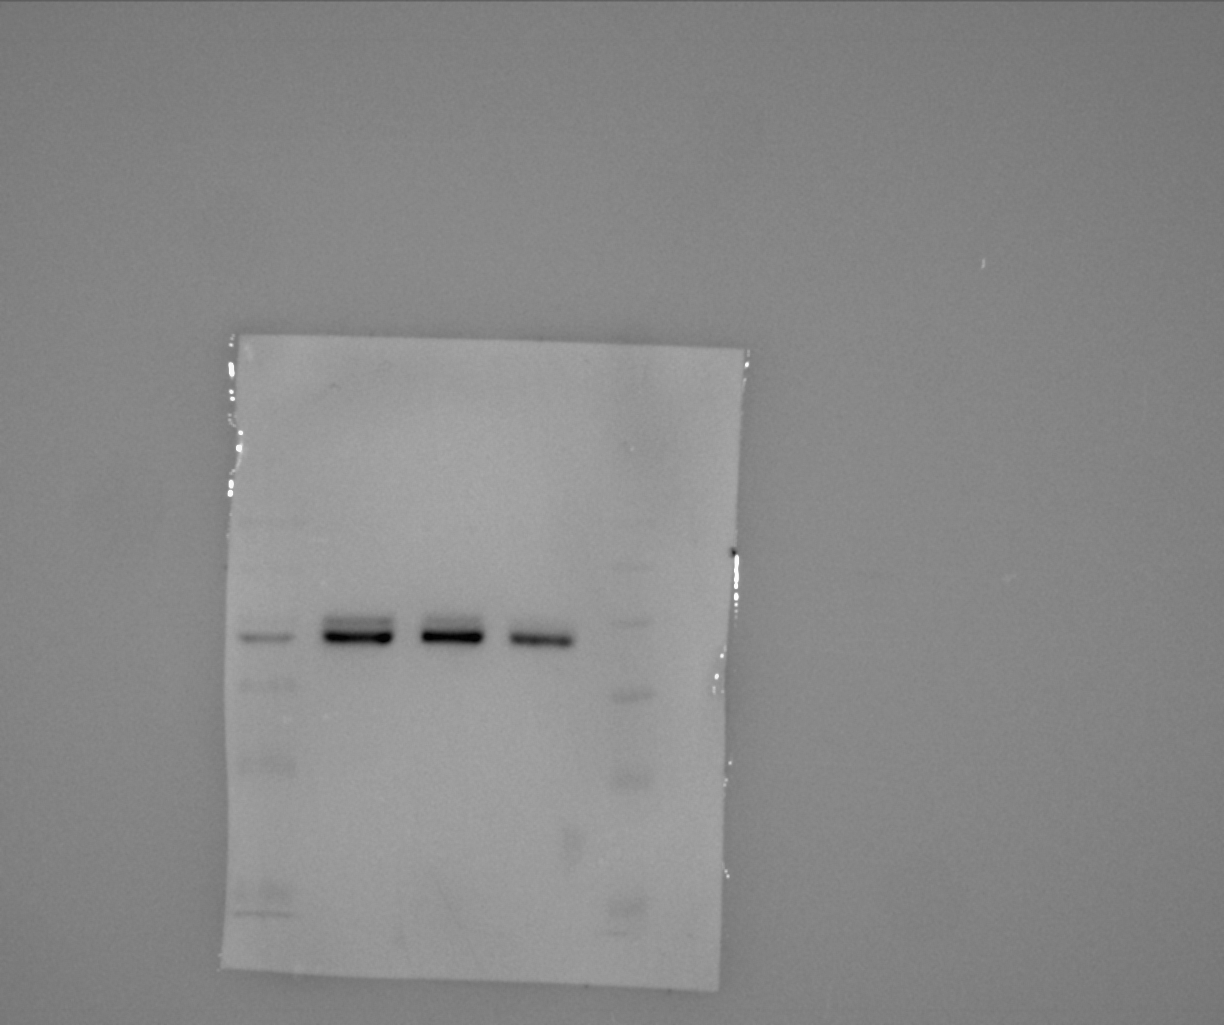

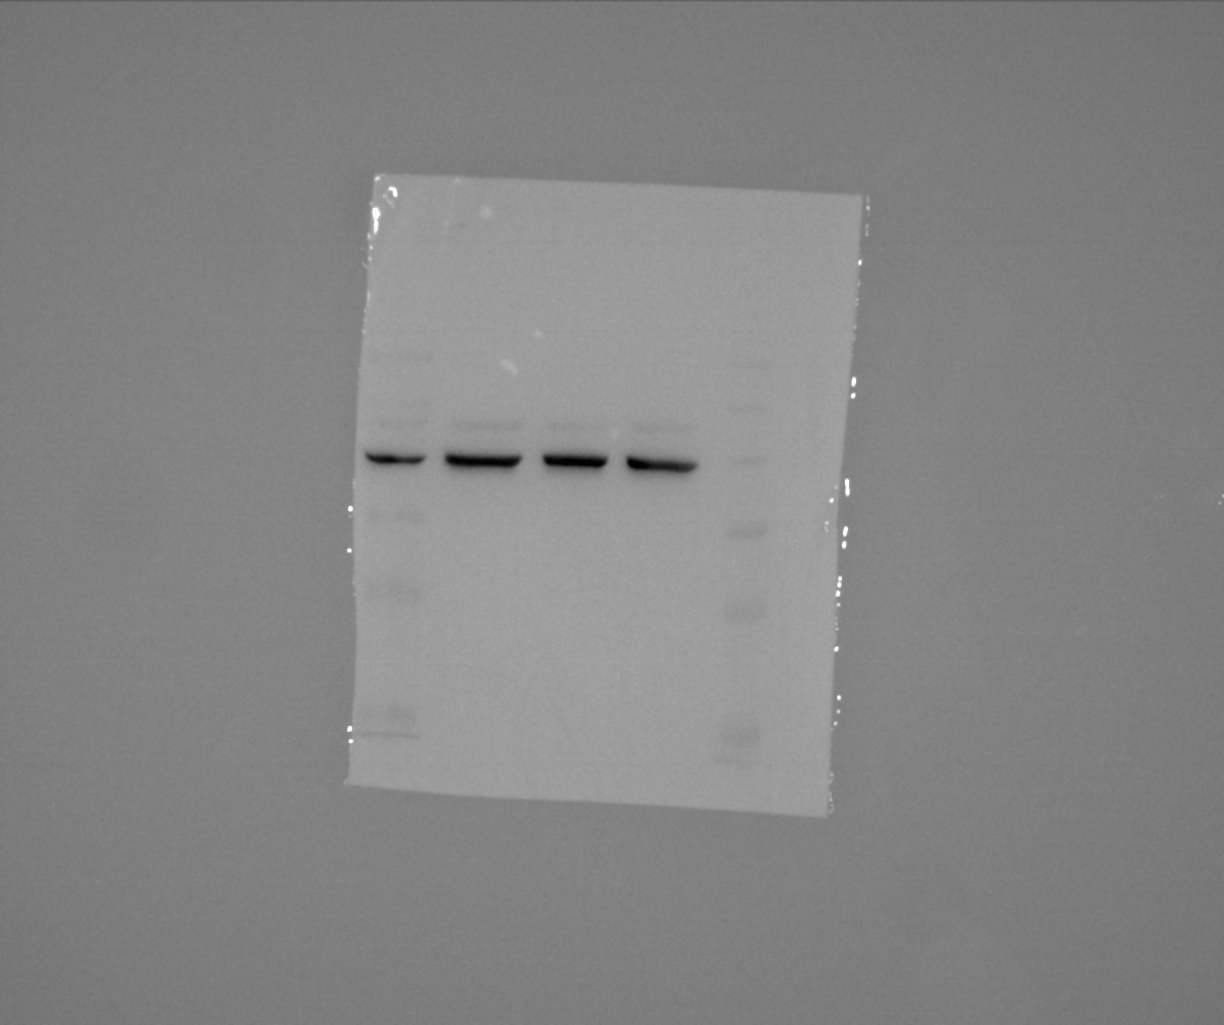


**-48kD**

**-48kD**

**Supplementary Figure 6**

**-pHSP27**

**35kD-**


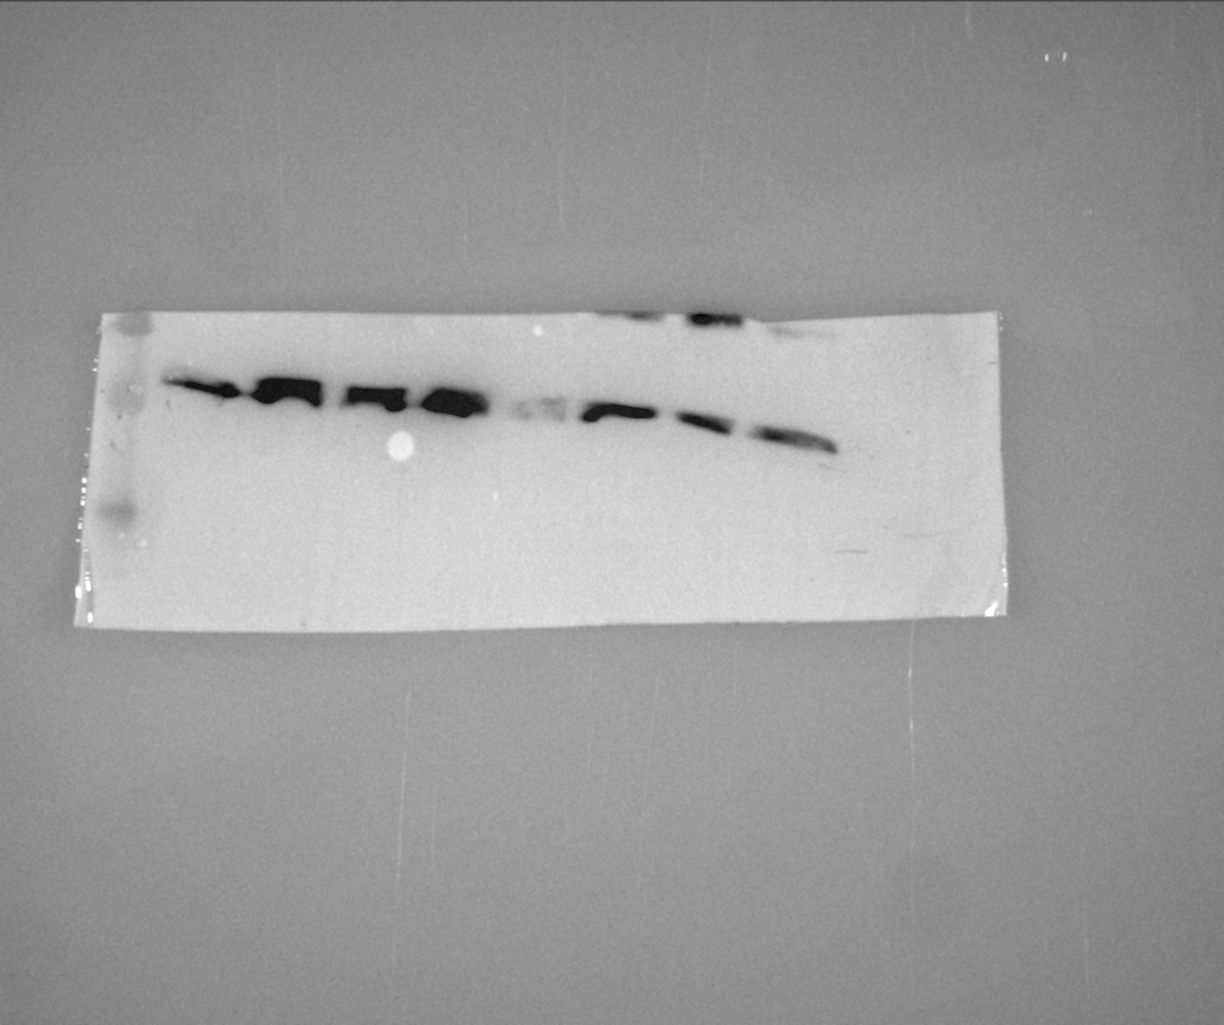


**-c-Jun**


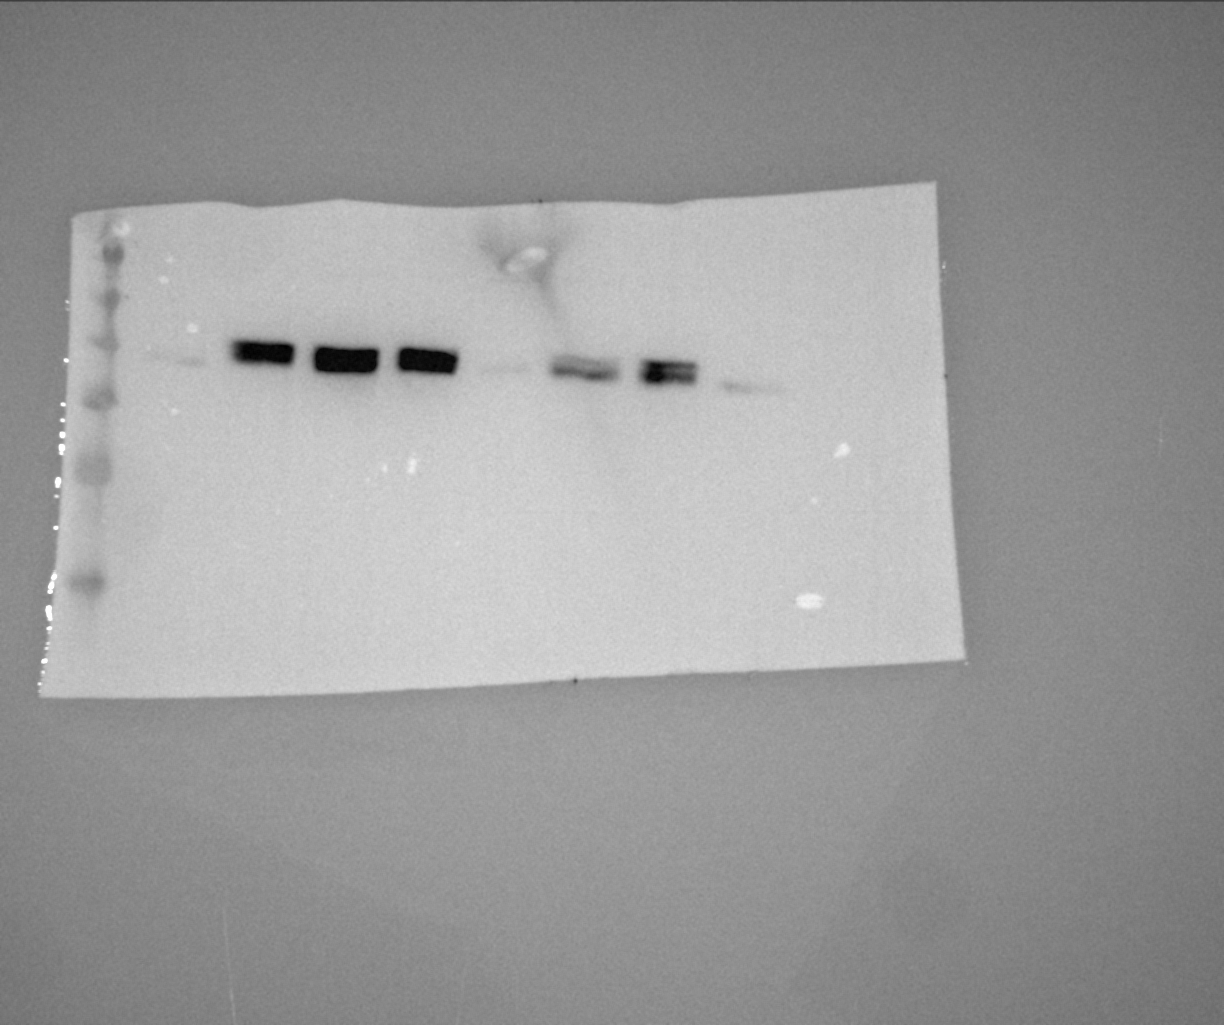


**48kD-**

**-b-tubulin**


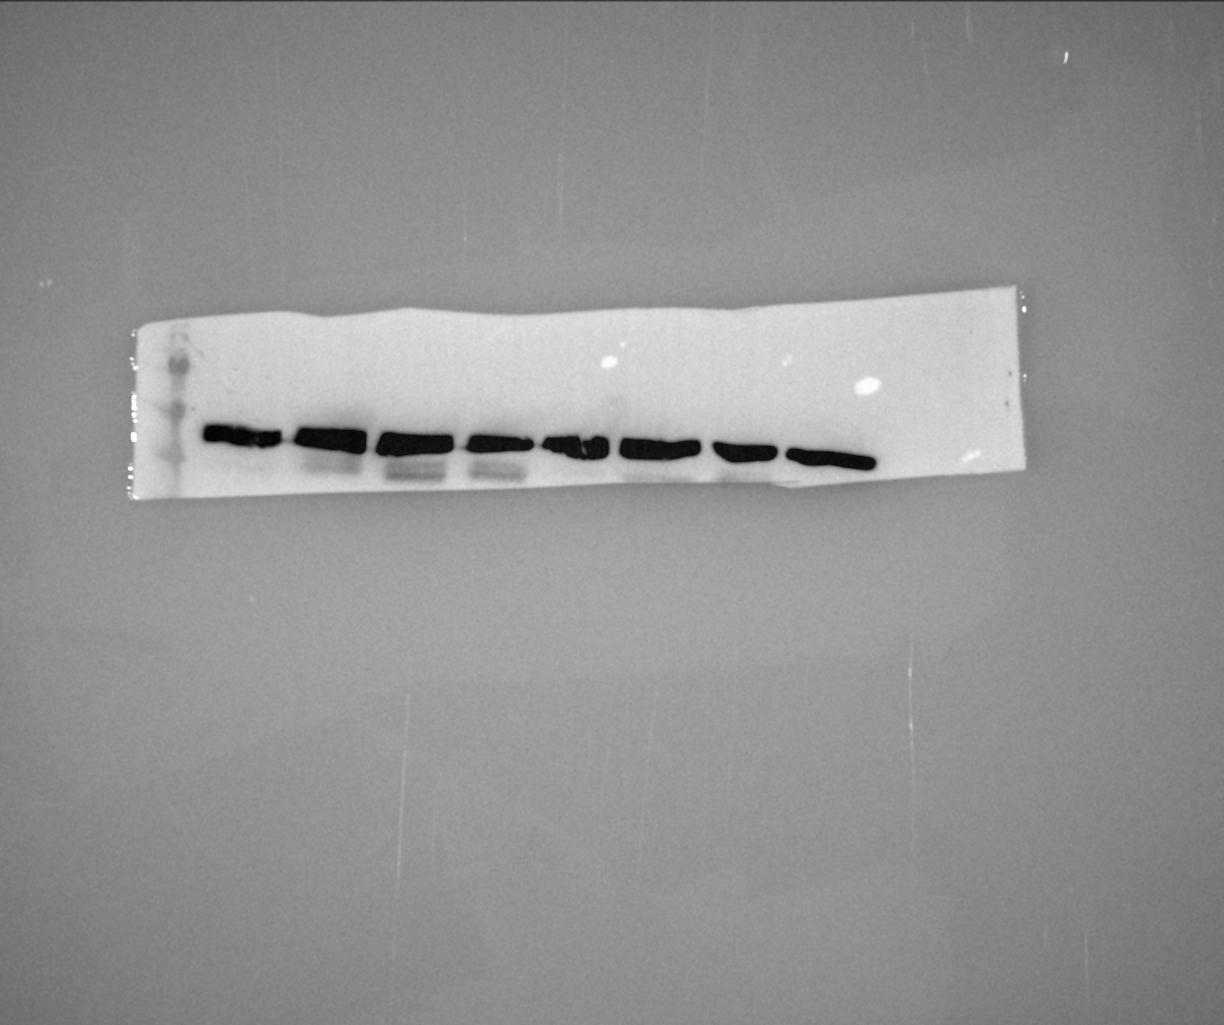


**3kD-**

**Supplementary Figure 9A**

**-pJNK**


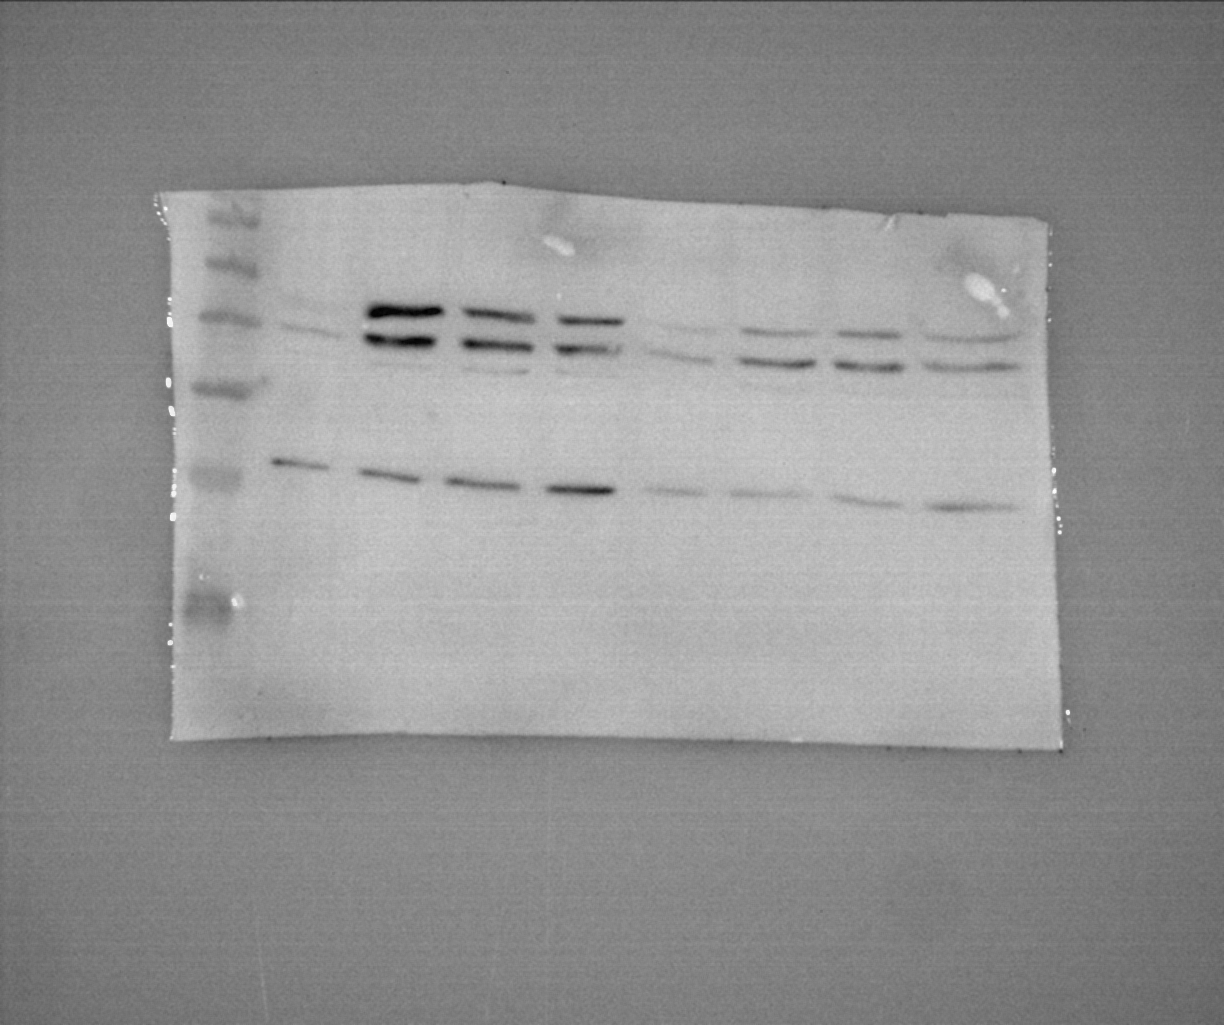


**48kD-**

**-p-p38 MAPK**


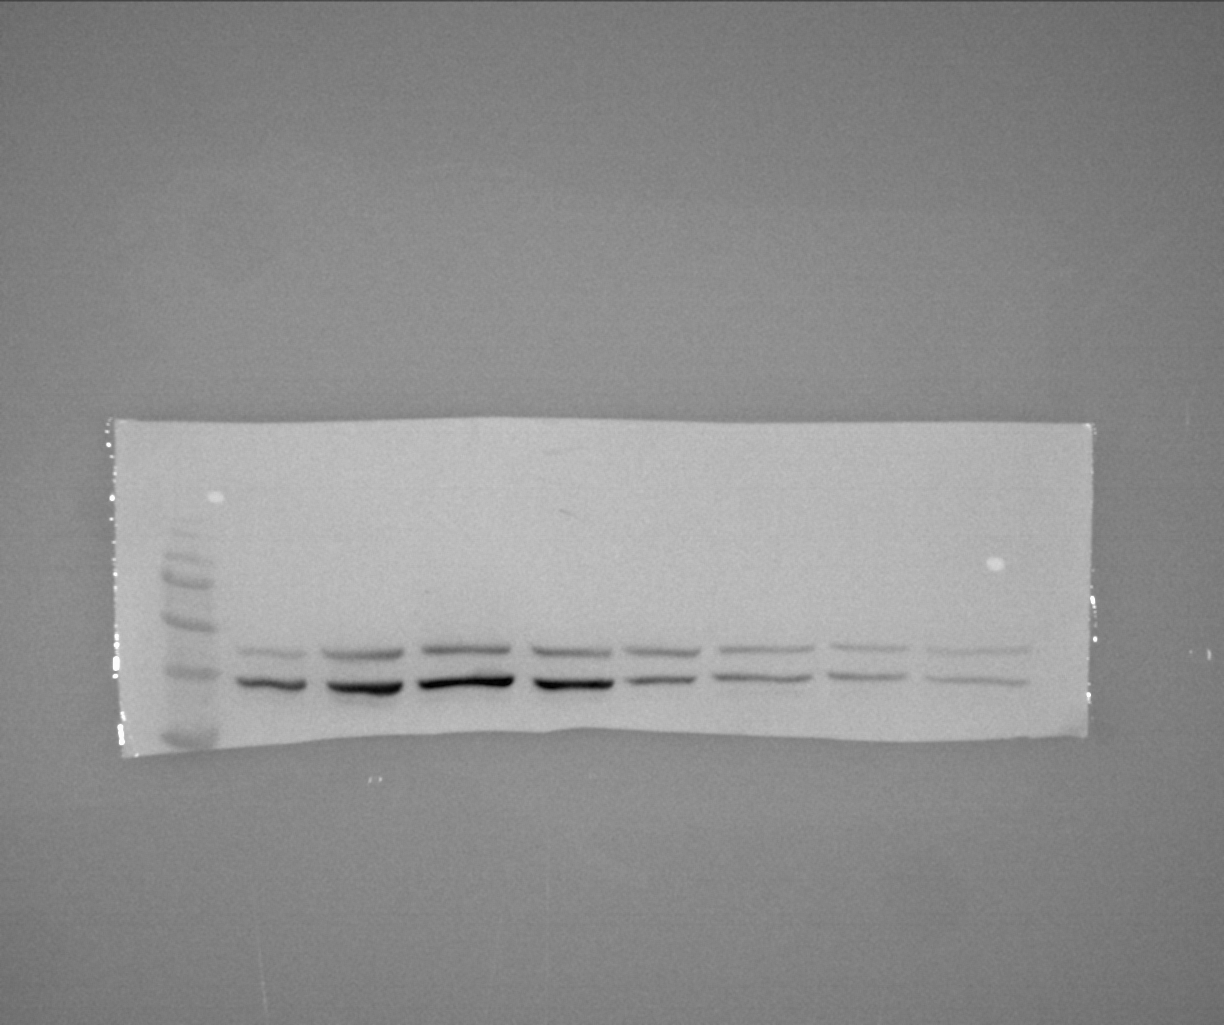


**48kD-**

**-CDC42 TOTAL**


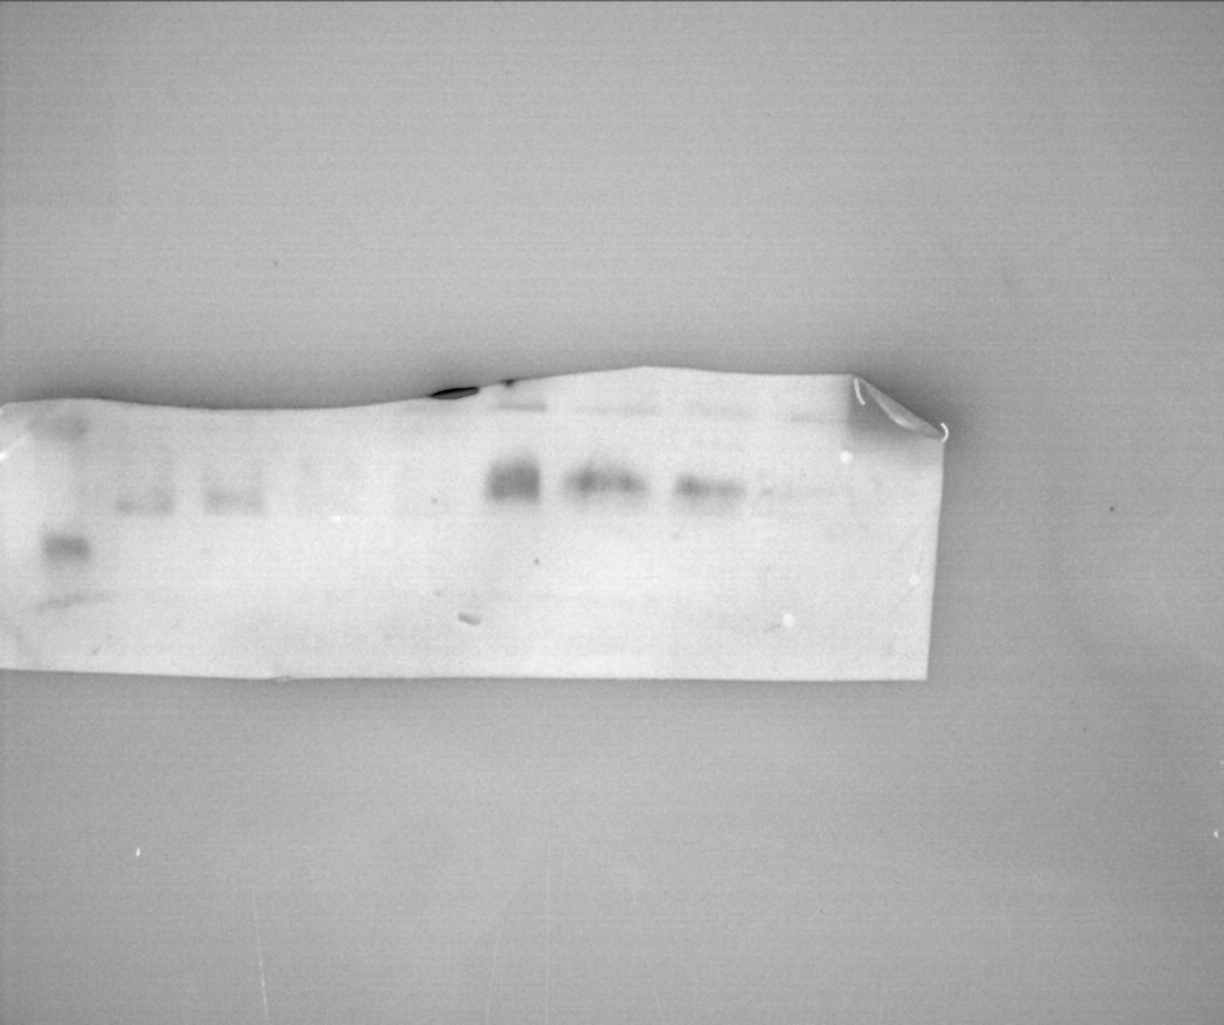


**28kD-**

**-b-actin**


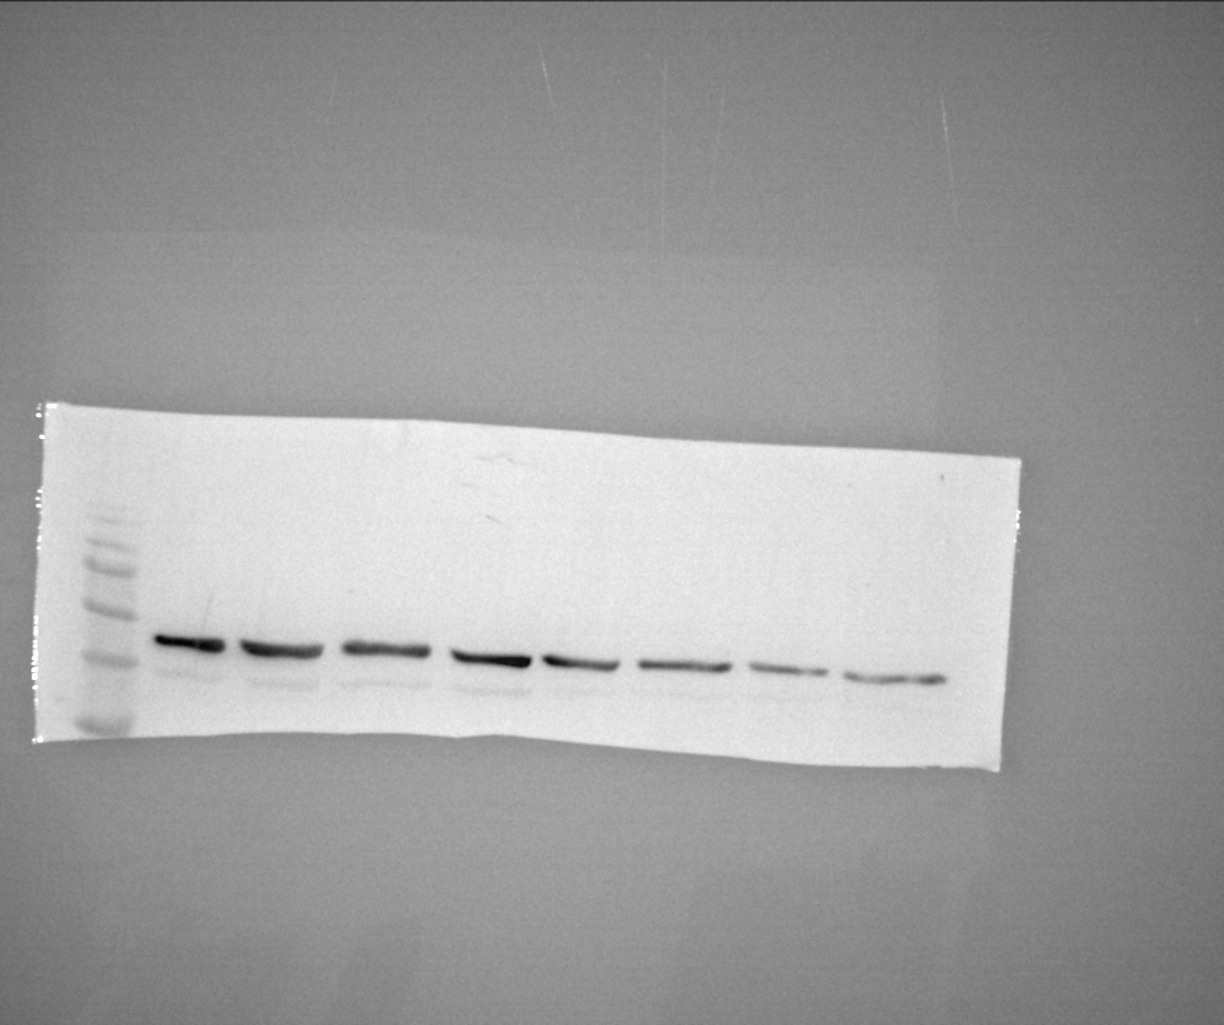


**48kD-**

**Supplementary Figure 9B**

**-Rac1**


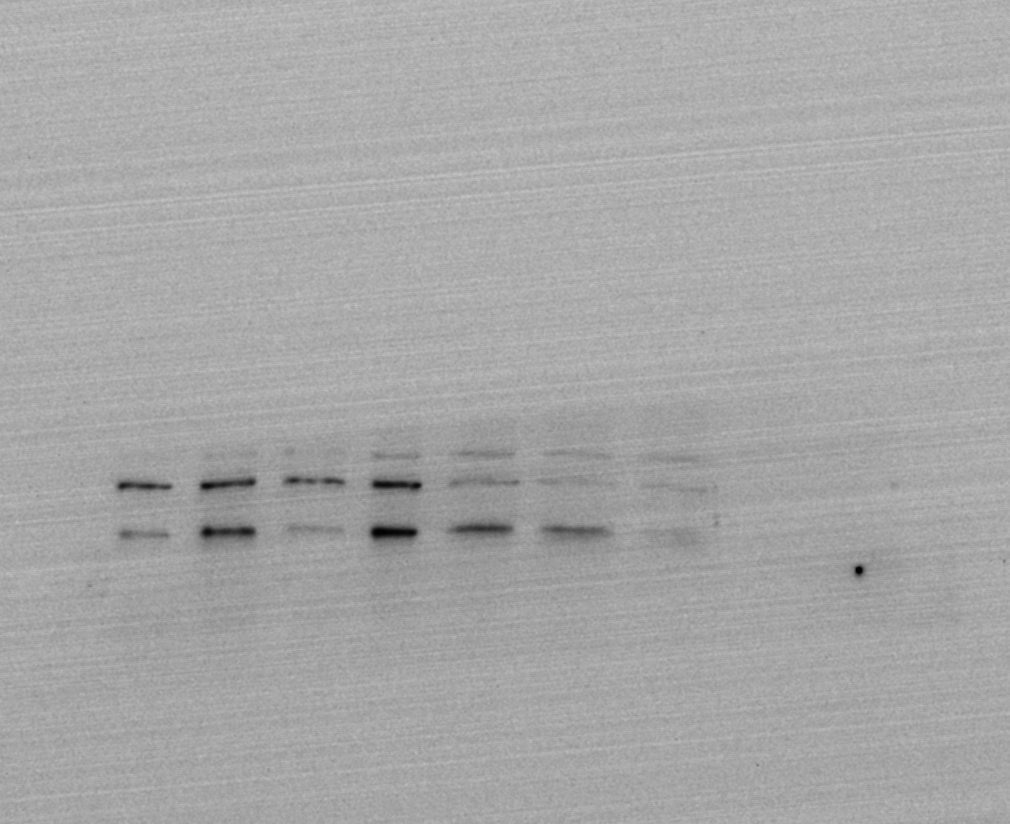


**-actin**


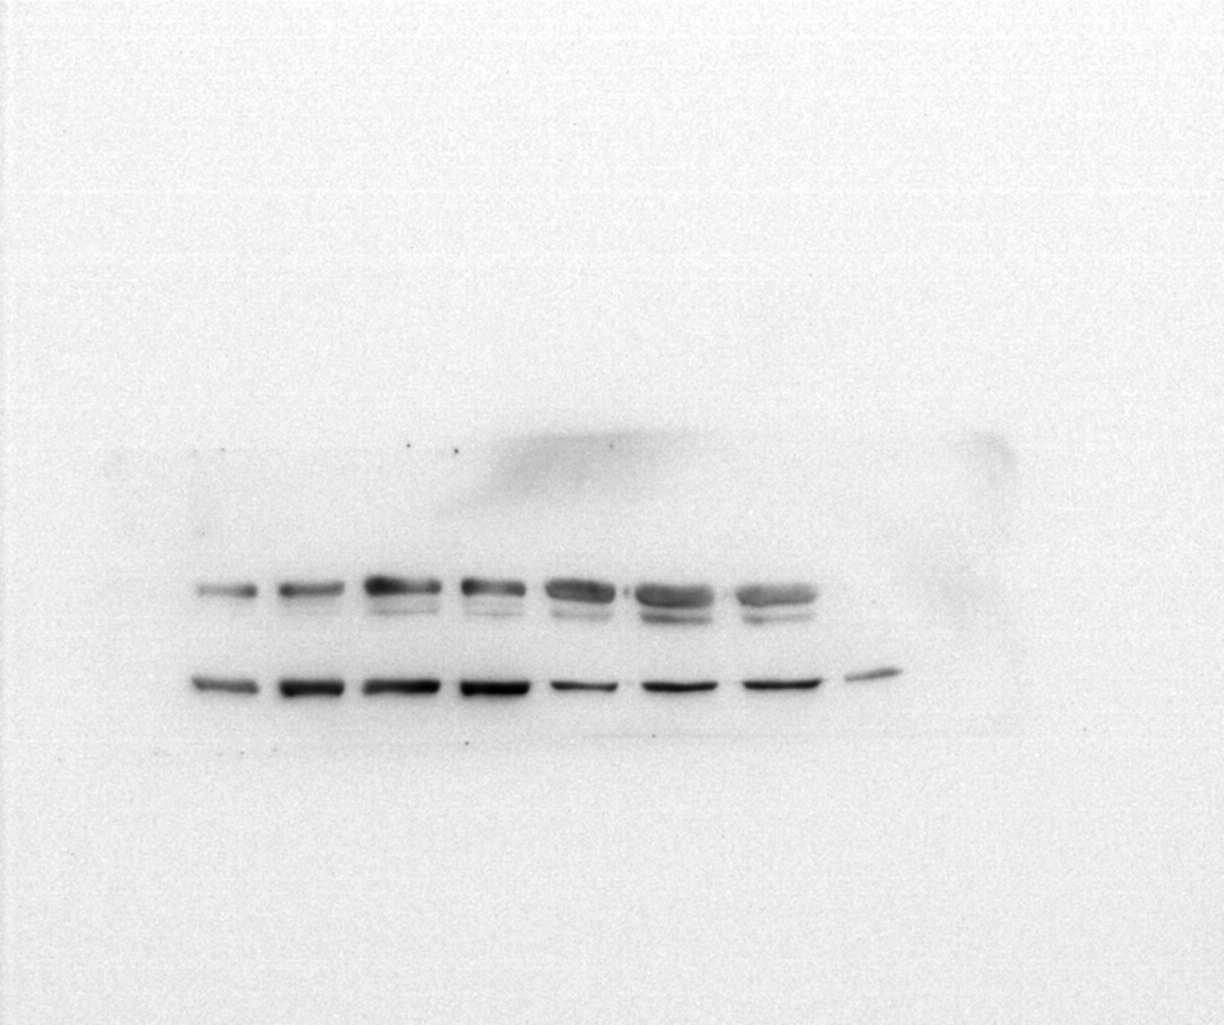


**Supplementary Table 1**


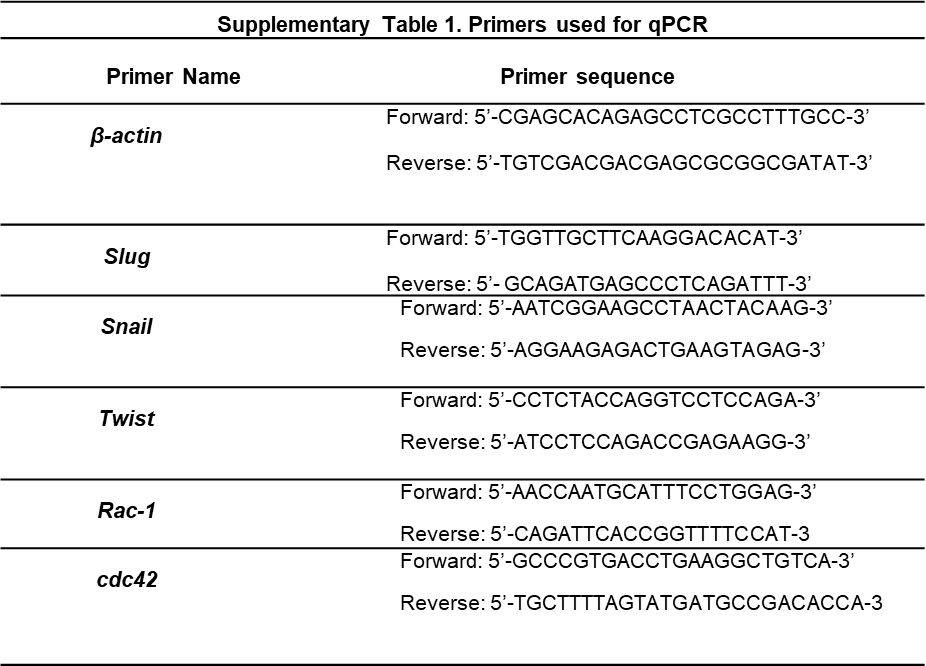


**Supplementary Table 2:** Gene ontology enrichment analysis in normal cell lines

**
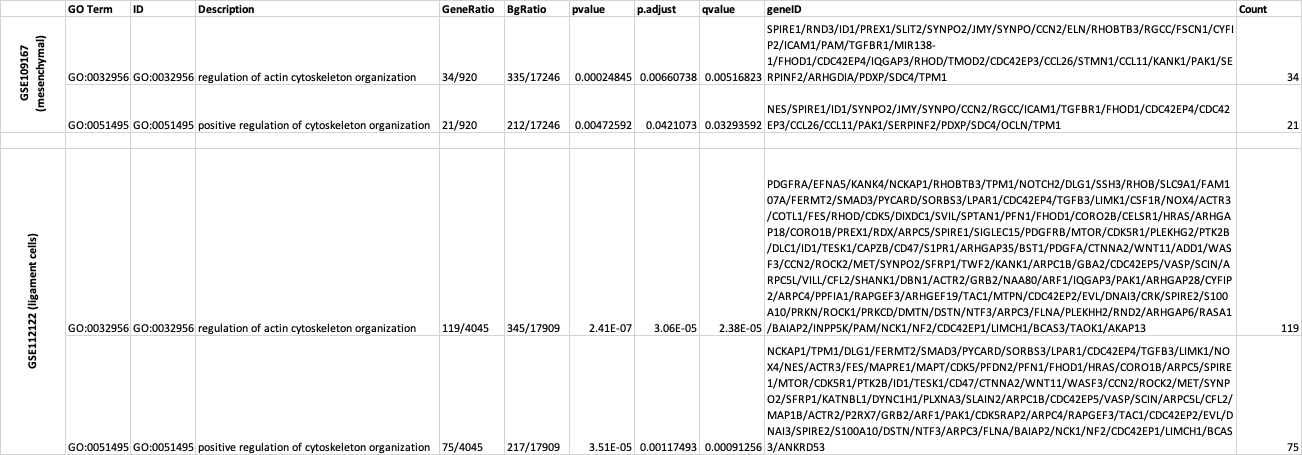
**

**SUPPLEMENTARY MATERIALS AND METHODS**

**AlamarBlue Assay**

Cancer cells were subjected to a cell viability test prior- and post- compression using AlamarBlue reagent (Thermo), according to the manufacturer’s instructions. %Difference in AlamarBlue Reagent was calculated in triplicates for each condition.
